# Supplementary material
Source: PubMed Central journal article supplement (PMC9869109)
Supplement: NIHMS1863126-supplement-Supporting_info_pdf.pdf [file NIHMS1863126-supplement-Supporting_info_pdf.pdf]

Supporting Information  
©Wiley-VCH 2021  
69451 Weinheim, Germany

## Intranuclear Nanoribbons for Selective Killing of Osteosarcoma Cells

Shuang Liu,<sup>[a] [b]</sup> Qiuxin Zhang,<sup>[b]</sup> Hongjian He,<sup>[b]</sup> Meihui Yi,<sup>[b]</sup> Weiyi Tan,<sup>[b]</sup> Jiaqi Guo,<sup>[b]</sup> and Bing Xu<sup>\*[b]</sup>

[a] School of Materials Science and Engineering, Wuhan University of Technology, 122 Luoshi Road, Wuhan, Hubei, 430070, China

[b] Department of Chemistry, Brandeis University, 415 South Street, Waltham, Massachusetts, 02454, United States

**Abstract:** Here we show intranuclear nanoribbons formed upon dephosphorylation of leucine-rich L- or D-phosphopentapeptide catalyzed by alkaline phosphatase (ALP) to selectively kill osteosarcoma cells. Being dephosphorylated by ALP, the peptides firstly transformed into micelles and then convert into nanoribbons. The peptides/assemblies firstly aggregate on cell membrane, then enter cells via endocytosis, and finally accumulate in nuclei (mainly in nucleoli). Proteomics analysis suggests that the assemblies interact with histone proteins. The peptides kill osteosarcoma cells rapidly, and are nontoxic to normal cells. Moreover, the repeated stimulation of the osteosarcoma cells by the peptides sensitizes the cancer cells rather than inducing resistance. This work not only illustrates a novel mechanism for nucleus-targeting, but also may lead a new way to selectively kill osteosarcoma cells and overcome drug resistance.

DOI: 10.1002/anie.2021XXXXX

## SUPPORTING INFORMATION

---

### Table of Contents

|                                                                     |    |
|---------------------------------------------------------------------|----|
| Experimental Procedures .....                                       | 3  |
| Supplementary Figures .....                                         | 6  |
| Supplementary Tables .....                                          | 38 |
| Supplementary Movies: Description of the Supplementary Movies ..... | 40 |
| References .....                                                    | 40 |
| Author Contributions .....                                          | 40 |

## Experimental Procedures

### Materials.

2-Cl-trityl chloride resin (1.0-1.2 mmol/g), HOBt, HBTU, Fmoc-OSu, and other Fmoc-amino acids were purchased from GL Biochem (Shanghai, China). Other chemical reagents and solvents were purchased from Fisher Scientific. Alkaline phosphatase was purchased from Biomatik (Cat. No. A1130, Alkaline Phosphatase [ALP], 30000 U/mL, in 50% Glycerol.), Fetal bovine serum (FBS) and penicillin-streptomycin from Gibco by Life Technologies.

### General.

All precursors were purified with Agilent 1100 Series Liquid Chromatograph system, equipped with an XTerra C18 RP column and Variable Wavelength Detector. The LC-MS spectra were obtained with a Waters Acquity Ultra Performance LC with Waters MICROMASS detector, and <sup>1</sup>H NMR spectra on Varian Unity Inova 400. Circular dichroism (CD) spectra were obtained with a Jasco J-810 Spectropolarimeter.

### Synthesis of compounds.

**Synthesis of NBD-β-Alanine:** To the solution of β-Alanine (5 mmol, 1 g) and K<sub>2</sub>CO<sub>3</sub> (15 mmol, 2 g) in H<sub>2</sub>O (15 mL), the solution of NBD-Cl in MeOH (30 mL) was added dropwise under the protection of N<sub>2</sub>. After reaction at room temperature for 3 h, the MeOH was removed by evaporation. After adding 70 mL H<sub>2</sub>O, the pH of the solution was adjusted by 1 M HCl to ~3. The solution was extracted by diethyl ether (200 mL × 3), and the organic part was dried by Na<sub>2</sub>SO<sub>4</sub>, filtered and concentrated by evaporation. <sup>1</sup>H NMR of NBD-β-Alanine (400 MHz, CD<sub>3</sub>OD-d<sub>4</sub>) δ (ppm): 8.55 (m, 1H), 6.40 (d, 1H), 3.82 (s, 2H), 2.79 (t, 2H) (Figure S1). MS of NBD-β-Alanine: calc. [M-H]<sup>-</sup> = 251.04, obsvd. ESI-MS: M/Z = 250.95 (Figure S2).

**Synthesis of Fmoc-L-Tyr(PO<sub>3</sub>H<sub>2</sub>)-OH and Fmoc-D-Tyr(PO<sub>3</sub>H<sub>2</sub>)-OH:** The mixture of P<sub>2</sub>O<sub>5</sub> (35 mmol, 10 g), H<sub>3</sub>PO<sub>4</sub> (133 mmol, 13 g) and H-L-Tyr-OH (18 mmol, 3.22 g) was stirred for 24 h at 80°C in N<sub>2</sub> atmosphere. After adding 30 mL H<sub>2</sub>O and stirred for 30 min at 80°C, the reaction mixture was cool to room temperature. The reaction mixture was added to butanol (650 mL) dropwise and recrystallized at 4°C overnight, filtration provided H-L-Tyr(PO<sub>3</sub>H<sub>2</sub>)-OH as white powder. To the solution of H-L-Tyr(PO<sub>3</sub>H<sub>2</sub>)-OH (2 mmol, 522 mg) in H<sub>2</sub>O (20 mL), the solution of Fmoc-OSu (2.4 mmol, 808 mg) in MeCN (20 mL) was added. After adjusting pH to ~8 by triethylamine (TEA), the solution was stirred at room temperature for 2 h. After removal of MeCN by evaporation, 60 mL H<sub>2</sub>O was added and the pH of the solution was adjusted to ~3 by 1 M HCl. After extraction by ethyl acetate (100 mL × 3), the organic part was washed by 1 M HCl (100 mL × 2) and brine (100 mL × 1). After being dried by Na<sub>2</sub>SO<sub>4</sub>, filtered and concentrated by evaporation, Fmoc-L-Tyr(PO<sub>3</sub>H<sub>2</sub>)-OH was provided as white powder. By the same method, Fmoc-D-Tyr(PO<sub>3</sub>H<sub>2</sub>)-OH was provided as white powder.

**Synthesis of 1Lp, 1L, 1Dp, 1D, and 1DLp:** 1Lp, 1L, 1Dp, 1D and 1DLp were synthesized by solid phase peptide synthesis with 2-Cl-trityl chloride resin, Fmoc-L-Tyr(PO<sub>3</sub>H<sub>2</sub>)-OH, Fmoc-D-Tyr(PO<sub>3</sub>H<sub>2</sub>)-OH, Fmoc-L-Tyr(tBu)-OH, Fmoc-D-Tyr(tBu)-OH, Fmoc-L-Leu-OH, Fmoc-D-Leu-OH, NBD-β-Alanine, HOBt and HBTU. Purification with HPLC provided 1Lp, 1L, 1Dp, 1D and 1DLp as yellow powder. <sup>1</sup>H NMR of 1Lp (400 MHz, DMSO-d<sub>6</sub>) δ (ppm): 7.77 (d, 1H, J = 8 Hz), 7.14 (d, 2H, J = 8 Hz), 7.04 (d, 2H, J = 8 Hz), 6.45 (d, 1H, J = 8 Hz), 4.36 (m, 1H), 4.28 (m, 4H), 2.98 (m, 2H), 2.86 (m, 2H), 2.61 (m, 2H), 1.54 (m, 4H), 1.41 (m, 8H), 0.79 (m, 24H) (Figure S3). MS of 1Lp: calc. [M-H]<sup>-</sup> = 946.41, obsvd. ESI-MS: M/Z = 946.63 (Figure S4). <sup>1</sup>H NMR of 1L (400 MHz, DMSO-d<sub>6</sub>) δ (ppm): 7.76 (d, 1H, J = 8 Hz), 6.97 (d, 2H, J = 8 Hz), 6.63 (d, 2H, J = 8 Hz), 6.45 (d, 1H, J = 8 Hz), 4.30 (m, 5H), 3.15 (m, 2H), 2.90 (m, 1H), 2.79 (m, 1H), 2.60 (m, 2H), 1.55 (m, 4H), 1.41 (m, 8H), 0.80 (m, 24H) (Figure S5). MS of 1L: calc. [M-H]<sup>-</sup> = 866.44, obsvd. ESI-MS: M/Z = 866.52 (Figure S6). <sup>1</sup>H NMR of 1Dp (400 MHz, DMSO-d<sub>6</sub>) δ (ppm): 7.76 (d, 1H, J = 8 Hz), 7.13 (d, 2H, J = 8 Hz), 7.04 (d, 2H, J = 8 Hz), 6.45 (d, 1H, J = 8 Hz), 4.36 (m, 1H), 4.28 (m, 4H), 2.98 (m, 2H), 2.86 (m, 2H), 2.62 (m, 2H), 1.54 (m, 4H), 1.41 (m, 8H), 0.79 (m, 24H) (Figure S7). MS of 1Dp: calc. [M-H]<sup>-</sup> = 946.41, obsvd. ESI-MS: M/Z = 946.57 (Figure S8). <sup>1</sup>H NMR of 1D (400 MHz, DMSO-d<sub>6</sub>) δ (ppm): 7.76 (d, 1H, J = 8 Hz), 6.97 (d, 2H, J = 8 Hz), 6.63 (d, 2H, J = 8 Hz), 6.45 (d, 1H, J = 8 Hz), 4.30 (m, 5H), 3.15 (m, 2H), 2.90 (m, 1H), 2.79 (m, 1H), 2.61 (m, 2H), 1.55 (m, 4H), 1.42 (m, 8H), 0.80 (m, 24H) (Figure S9). MS of 1D: calc. [M-H]<sup>-</sup> = 866.44, obsvd. ESI-MS: M/Z = 866.59 (Figure S10). MS of 1DLp: calc. [M-H]<sup>-</sup> = 946.41, obsvd. ESI-MS: M/Z = 947.75 (Figure S11).

**Synthesis of 2Lp and 2Dp:** Compounds **A** and **B** were synthesized by solid phase peptide synthesis with 2-Cl-trityl chloride resin, Fmoc-L-Tyr(PO<sub>3</sub>H<sub>2</sub>)-OH, Fmoc-D-Tyr(PO<sub>3</sub>H<sub>2</sub>)-OH, Fmoc-L-Lys(Boc)-OH, Fmoc-D-Lys(Boc)-OH, Fmoc-L-Leu-OH, Fmoc-D-Leu-OH, NBD-β-Alanine, HOBt and HBTU. Precipitation in ether provided **A** and **B** as yellow solid. **A** (0.5 mmol, 574 mg) was dissolved in trifluoroacetic acid (TFA, 5 mL) and stirred at room temperature for 1 h. After removed the TFA and dried in vacuum, the product was dissolved in 5 mL dry DMF. Biotin (0.6 mmol, 146 mg), HBTU (0.72 mmol, 273 mg) and DIEA (0.5 mL) were stirred in 2 mL dry DMF for 10 min, and then the mixture was added into the prior solution dropwise. After reaction at room temperature overnight, purification with HPLC provided 2Lp as yellow powder. By the same method, 2Dp was provided as yellow powder. MS of 2Lp: calc. M = 1301.59, obsvd. ESI-MS: M/Z = 1301.86 (Figure S12). MS of 2Dp: calc. M = 1301.59, obsvd. ESI-MS: M/Z = 1301.95 (Figure S13).

### TEM sample preparation.

After placing 5 μL samples on 400 mesh copper grids coated with continuous thick carbon film (~35 nm) which was glow discharged, we washed the grid with ddH<sub>2</sub>O and UA (uranyl acetate). The sample loaded grid was stained with the UA. The residual UA was removed by filter paper and then dried in air. TEM images were obtained with FEI Morgagni 268 80 kV with a 1 k × 1 k AMT CCD camera.

### Critical micelle concentration (CMC) measurement.

## SUPPORTING INFORMATION

The CMCs were determined using pyrene as the fluorescent probe. Different concentrations of compounds were prepared in pyrene-saturate solutions. The fluorescence spectra of pyrene solutions with different concentration compounds were obtained. The intensity ratio of 378 nm/393 nm ( $I_{378}/I_{393}$ ) was determined by a BioTek Synergy H1 Microplate Reader. Plot  $I_{378}/I_{393}$  against the concentrations of compounds. The concentration at the turning point is the CMC.

### Cell culture.

SJSA-1 cell line, Saos2 cell line, HS-5 cell line, HEK293 cell line, HeLa cell line, HepG2 cell line, VCaP cell line and PC3 cell line, were purchased from American Type Culture Collection (ATCC, USA). A2780 cell line and A2780cis cell line were purchased from Sigma. RFP expressing SJSA-1 cell line was purchased from Angio-proteomie (cAP-0073RFP). The RFP expressing SJSA-1 cells were selected from the SJSA-1 cells transfected with RFP expressing lentiviruses resistant to Zeocin. OVSAHO cell line was given by Dr. Daniela Dinulescu group. SJSA-1 cells, RFP expressing SJSA-1 cells, OVSAHO cells, A2780 cells, and A2780cis cells were cultured in RPMI-1640 Medium supplemented with 10% fetal bovine serum (FBS), 100 U/mL penicillin and 100 µg/mL streptomycin. Saos2 cells were cultured in McCoy's 5A Medium supplemented with 15% fetal bovine serum (FBS), 100 U/mL penicillin and 100 µg/mL streptomycin. HeLa cells, HepG2, and HEK293 cells were cultured in Eagle's Minimum Essential Medium (MEM) supplemented with 10% fetal bovine serum (FBS), 100 U/mL penicillin and 100 µg/mL streptomycin. HS-5 cells, and VCaP cells were cultured in Dulbecco's Modified Eagle Medium (DMEM) supplemented with 10% fetal bovine serum (FBS), 100 U/mL penicillin and 100 µg/mL streptomycin. All cells were maintained at 37°C in a humidified atmosphere of 5% CO<sub>2</sub>.

### Cell viability.

We determined the cytotoxicity against cells by using MTT assay. Cells were seeded in 96-well plates at  $1 \times 10^5$  cells/well for 24 hours followed by culture medium removal and subsequently addition of culture medium containing treating reagent. After 1/2/3 hours, the culture medium with treating reagent was replaced by fresh culture medium and 10 µL MTT solution (5 mg/mL) was added to each well and incubated at 37°C for another 4 h. Then 100 µL of SDS-HCl solution was added to stop the reduction reaction and dissolve the formazan. The absorbance of each well at 595 nm was measured by a Beckman Coulter DTX880 Multimode Detector. The results were calculated as cell viability percentage relative to untreated cells. Data were obtained from three independent wells ( $n = 3$ ).

### Gene Transfection of HEK293 cell line.

The gene transfection in HEK293 cells was done according to a previously reported method<sup>[1]</sup>. Briefly, alkaline Phosphatase cDNA ORF Clone, Human, C-OFPSpark tag gene (Sino Biological Inc., Cat: HG10440-ACR) was incubated with polyethylenimine (PEI, MW = 25, 000) for 20 min. Then, the mixture was added to HEK293 cells incubated with serum-free culture medium for another overnight incubation. After the incubation, cells were detached from petri dish by trypsin, and then 1/3 of the cells were seeded backed to the petri dish. The cells were incubated in cell culture hood until further analysis.

### Actin-RFP and tubulin-RFP transfection.

Invitrogen CellLight Actin-RFP, BacMam 2.0 and Invitrogen CellLight Tubulin-RFP, BacMam 2.0 were used as BacMam 2.0 reagents for actin-RFP and tubulin-RFP transfection. Cells in exponential growth phase were seeded in a confocal dish (3.5 cm) at  $1.0 \times 10^4$  cells per dish and then incubated in incubator for 24 h. We removed culture medium, and added fresh medium containing 4 µM BacMam 2.0 reagent. The cells were incubated for 16 h at 37°C for further use.

### Uptake test.

SJSA-1 Cells were seeded in 96-well plates at  $3 \times 10^5$  cells/well for 6 hours followed by culture medium removal and subsequently addition of culture medium containing different concentration of **1Lp** or **1Dp** (immediately diluted from fresh prepared 10 mM stock solution) with or without endocytosis inhibitors. After 2 hours, washed the cells by HBS, added 100 µL DMSO, and then incubated the cells at 37°C for another 15 min. The fluorescence intensity of each well at 552 nm ( $\lambda_{ex} = 488$  nm) was measured by a BioTek Synergy H1 Microplate Reader. The results were calculated as cell viability percentage relative to untreated cells. Data were obtained from three independent wells ( $n = 3$ ).

### Fractionation.

3 million SJSA-1 cells were seeded in 10 mL petri dishes, incubated 24 h for attachment, and then were treated with **1Lp** or **1Dp** (200 µM, 4 h). Following the treatment, cells were washed twice with PBS, harvested by trypsin treatment, and resuspended in PBS. After the cell number was counted, the cell suspension was centrifuged at 300g for 5 min, and the obtained pellet was resuspended in 10 ml of distilled water for 30 min to lyse the cells. Clumps of unbroken and ruptured cells were removed by centrifugation at 300 g for 5 min. Centrifugation at 600 g for 10 min provides **Sample N** and centrifugation at 15000 g for 5 min provides **Sample M**. The samples were dissolved in DMSO and the fluorescence intensity was measured at 552 nm ( $\lambda_{ex} = 488$  nm) by a BioTek Synergy H1 Microplate Reader. Data were obtained from three independent wells ( $n = 3$ ).

### Confocal laser scanning microscopy (CLSM) imaging.

For live cell imaging, cells in exponential growth phase were seeded in a confocal dish (3.5 cm) at  $1.0 \times 10^5$  cells per dish and then incubated in incubator for 24 h. We removed culture medium, and added fresh medium containing precursors for different time points. After removing the medium and washing the cells with live cell imaging solution (2 mL  $\times$  2), the cells were used for CLSM imaging. For time-dependent live cell 2D imaging, cells in exponential growth phase were seeded in a confocal dish (3.5 cm) at  $1.0 \times 10^5$  cells per dish and then incubated in incubator for 24 h. After removing culture medium, we treated the cells with 1 mL of Hoechst 33342 (1

## SUPPORTING INFORMATION

$\mu\text{g/mL}$ ) for 10 minutes. After being washed with culture medium (2 mL  $\times$  2), the cells were incubated with fresh medium containing precursor in a Tokai Hit stage top incubator (STXF-WSKMX-SET) to be used for CLSM imaging.

For time-dependent live cell 3D imaging, cells in exponential growth phase were seeded in a confocal dish (3.5 cm) at  $1.0 \times 10^5$  cells per dish and then incubated in incubator for 24 h. After removing culture medium, we treated the cells with 1 mL of Hoechst 33342 (1  $\mu\text{g/mL}$ ) for 10 minutes. After being washed with culture medium (2 mL  $\times$  2), the cells were used for CLSM imaging.

All the 2D CLSM images were obtained using Zeiss LSM 880 confocal microscopy at the lens of 63x with oil. All the 3D CLSM images were obtained using Zeiss LSM 880 confocal microscopy with airyscan at the lens of 63x with oil. The lasers used are 405 nm, 488 nm and 561 nm.

### Proteomics.

1. Lysis and treatment: 13.5 million SJSA-1 cells were treated by 4 mL 400  $\mu\text{M}$  **2Lp** for 2 h. After removing the treating solution, the cells were digested by trypsin and collected by centrifuge (2000 rpm, 3min). After washing by PBS (2  $\times$ , 2000 rpm, 3 min), the cells were dispersed in 1 mL  $\text{H}_2\text{O}$  (1% protease inhibitor cocktail (Millipore Sigma Protease Inhibitor Cocktail Set III, EDTA-Free)) and lysed by freeze-thaw cycle (4  $\times$ ). The lysate sample was named as **Sample C**. 13.5 million SJSA-1 cells were digested by trypsin and collected by centrifuge (1000 rpm, 3 min), and then washed by PBS (2  $\times$ , 1500 rpm, 3 min). The cells were dispersed in 960  $\mu\text{L}$   $\text{H}_2\text{O}$  (1% protease inhibitor cocktail) and lysed by freeze-thaw cycle (4  $\times$ ). Added 40  $\mu\text{L}$  10 mM **2Lp** (final concentration is 400  $\mu\text{M}$ ) into the lysate and incubated at 37°C for 2 h. The sample was named as **Sample L**.

2. Enrichment: The protein samples from the last step were enriched with the RayBio Biotin Magnetic Beads (Catalog #: 801-107). The protocol was described briefly as follow: a. Added 100  $\mu\text{L}$  (0.5 mg) of beads to 1 mL of binding/wash buffer (TBS-0.05% Tween 20 detergent) in each tube to wash particles, and magnetically separated until the supernatant was clear and then removed the supernatant. Repeated to wash again. b. Resuspended the beads in 1350  $\mu\text{L}$  binding buffer and mixed with 150  $\mu\text{L}$  sample from the last step (**Sample C** or **Sample L**) to incubate in 37°C for 30 min. c. Magnetically separated, removed supernatant and washed with binding/wash buffer (0.5 mL  $\times$  2) to remove unbound proteins. d. The beads were mixed with 100  $\mu\text{L}$  of elution buffer (8 M guanidine-HCl, pH 1.5) and incubated at room temperature for 10 minutes with occasional gentle mixing, and then collected the solution. Repeated and collected the solution. e. Dialyzed the samples with Spectrum™ Labs Spectra-Por™ dialysis membrane (MWCO = 3.5 kD) in water for 2 h to remove the salt. And the samples were lyophilized.

3. In-gel digestion: The lyophilized samples were dissolved in 1% SDS RIPA buffer (1% protease inhibitor cocktail) and treated in laemmli buffer at 95°C for 5-10 min. The samples were loaded to SDS-PAGE and ran under 90 V, until the samples were resolved about 1 cm in gel. The gels were cut into 1  $\times$  1 to 2  $\times$  2 mm pieces and digested with Thermo Scientific In-Gel Tryptic Digestion Kit. The sample were extracted with C18 using the StageTip protocol. The sample from Sample C is called **PC** (Proteomics Cell) and the sample from Sample L is called **PL** (Proteomics Lysate).

4. LC-MS analysis: The sample were separated by using a nanoElute nanoflow chromatograph with a Bruker 15 nanoLC column and then analyzed by a Bruker timsTOF pro mass spectrometry. The data is analyzed with the PEAKS proteomics software.

### DNA sequestration.

Each test contained four groups: (1) DNA (50  $\mu\text{g/mL}$ ) + ALP (0.5 U/mL); (2) DNA (50  $\mu\text{g/mL}$ ) + **1Lp/1Dp** (200  $\mu\text{M}$ ) + ALP (0.5 U/mL); (3) DNA (50  $\mu\text{g/mL}$ ) + **1Lp/1Dp** (200  $\mu\text{M}$ ); (4) **1Lp/1Dp** (200  $\mu\text{M}$ ) + ALP (0.5 U/mL); (5) DNA (50  $\mu\text{g/mL}$ ). Group 5 is the control group, the remain ratio of DNA is 100%. All the samples were incubated at 37°C for 24 h and then centrifuged (10000 rpm, 10 min). The DNA concentrations of the supernatants were measured by using a FluoReporter Blue Fluorometric dsDNA Quantitation Kit ( $\lambda_{\text{ex}} = 360$  nm,  $\lambda_{\text{em}} = 460$  nm) as the concentrations of remain (unaggregated) DNA. The fluorescence intensity was measured by a BioTek Synergy H1 Microplate Reader. Data were obtained from three independent wells ( $n = 3$ ).

### Co-culture.

0.8 million RFP expressing SJSA-1 and 0.8 million HS-5 were co-cultured overnight to adhere. The cell mixtures were treated with **1Lp** or **1Dp** for 4 h. After refreshing the culture media, the cells were cultured overnight and then seeded into CLSM dish. After overnight culture to adhere, the cells were stained with Hoechst, and counted by using CLSM.

### Drug resistance test.

SJSA-1 cells were divided into three culture dishes. **Group 1**: The SJSA-1 cells were incubated with **1Lp** by gradually increasing the concentration from 20  $\mu\text{M}$  to 101  $\mu\text{M}$  for 5 weeks. **Group 2**: The SJSA-1 cells were incubated with **1Dp** by gradually increasing the concentration from 20  $\mu\text{M}$  to 69  $\mu\text{M}$  for 5 weeks. **Group 3**: SJSA-1 cells without any treatment of any compounds. We seeded stimulated cells in from **Group 1** and unstimulated SJSA-1 cells (**Group 3**) in 96-well plates at  $1 \times 10^5$  cells/well for 24 hours, and then we treated the cells with **1Lp** for 24 h. We measured the cell viability by MTT assay. We seeded stimulated cells in from **Group 2** and unstimulated SJSA-1 cells (**Group 3**) in 96-well plates at  $1 \times 10^5$  cells/well for 24 hours, and then we treated the cells with **1Dp** for 24 h. We measured the cell viability by MTT assay.

### Statistical analysis.

Data were presented as means  $\pm$  standard deviation (s.d.). The sample number ( $n$ ) indicates the number of independent biological samples in each experiment. All the means, standard deviation and statistical differences were calculated with Microsoft Excel.

# SUPPORTING INFORMATION

## Supplementary Figures

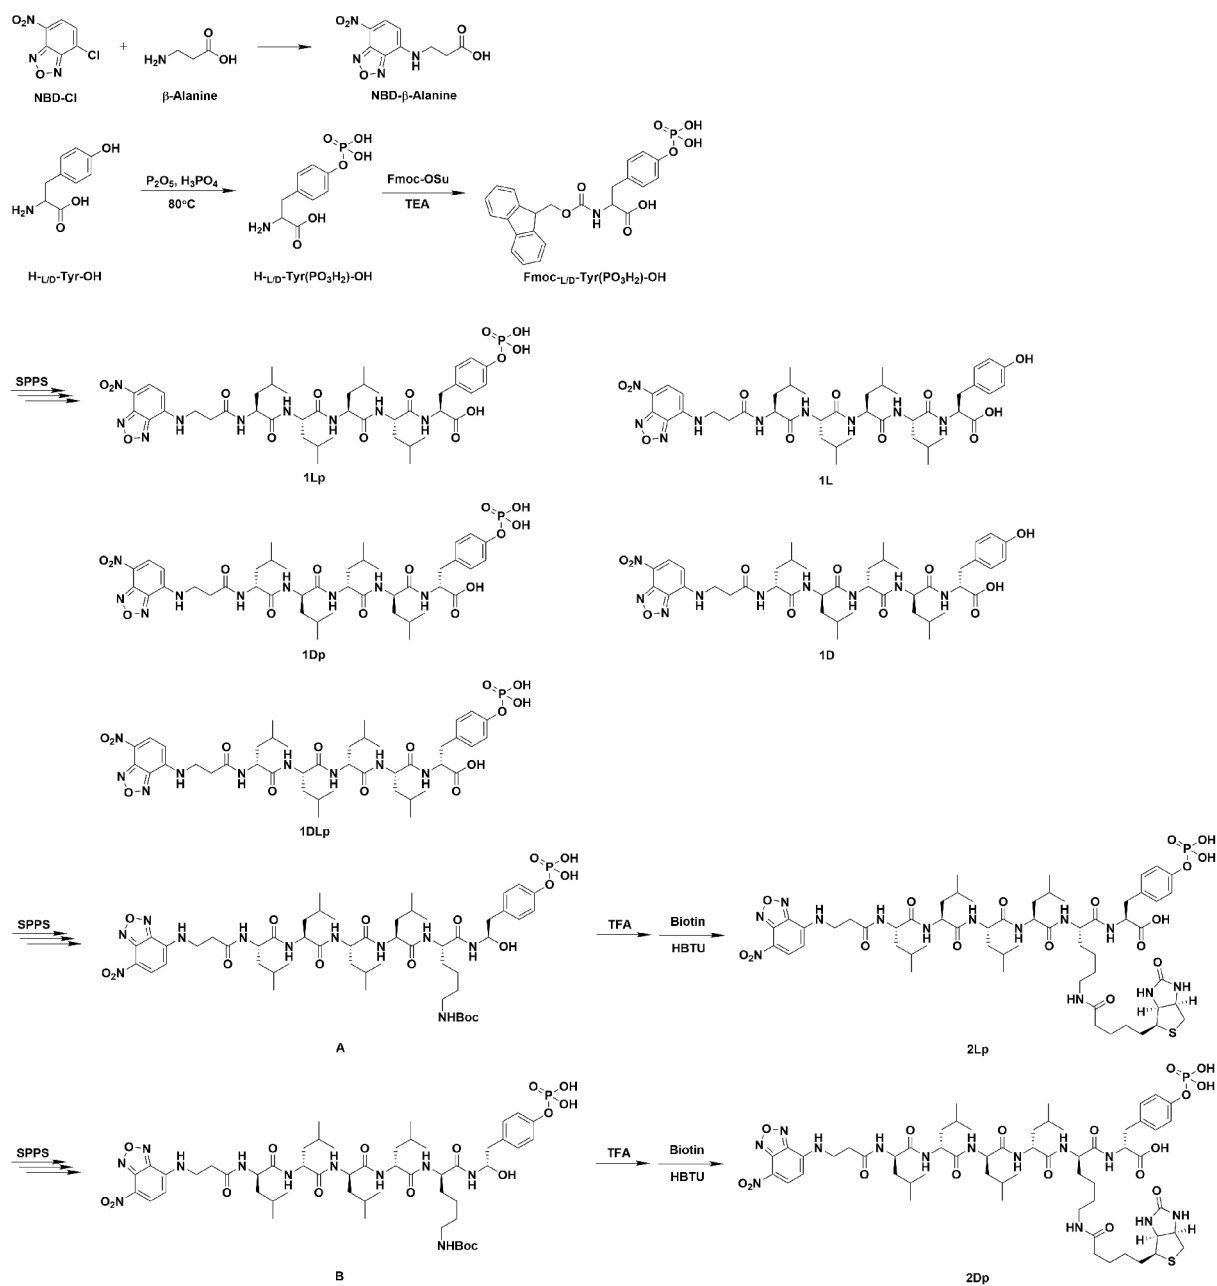

**Scheme S1.** Synthetic route of 1Lp, 1L, 1-Dp, 1-D, 1-DLp, 2Lp and 2Dp.

# SUPPORTING INFORMATION

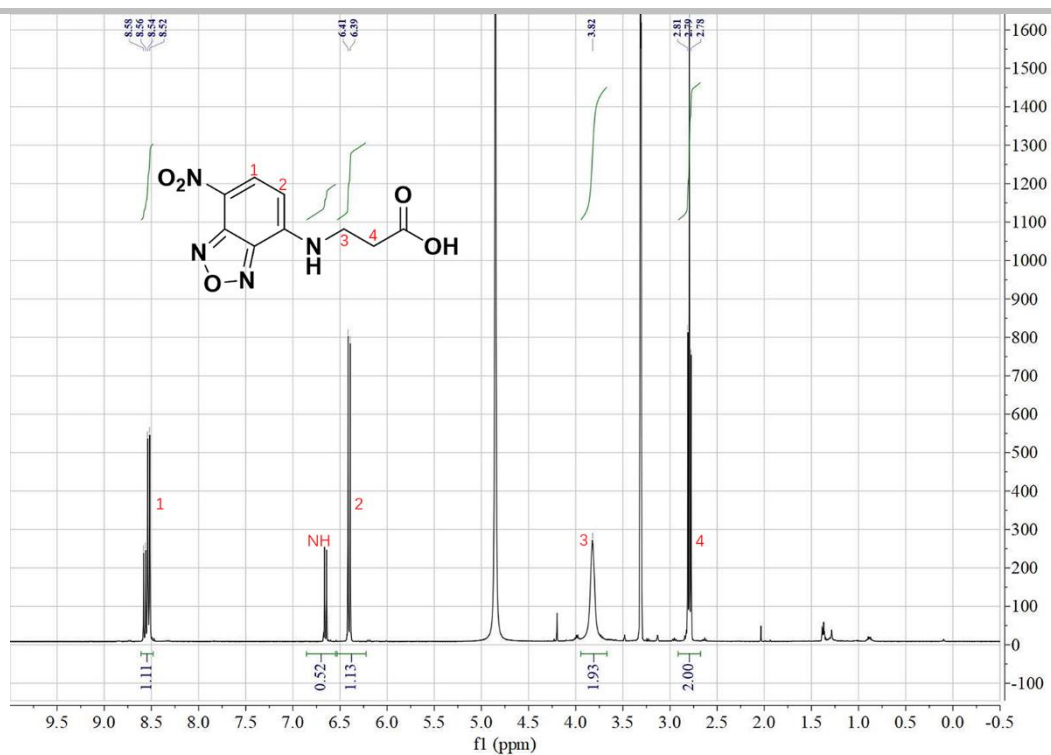

Figure S1.  $^1\text{H}$  NMR spectrum of NBD- $\beta$ -Alanine.

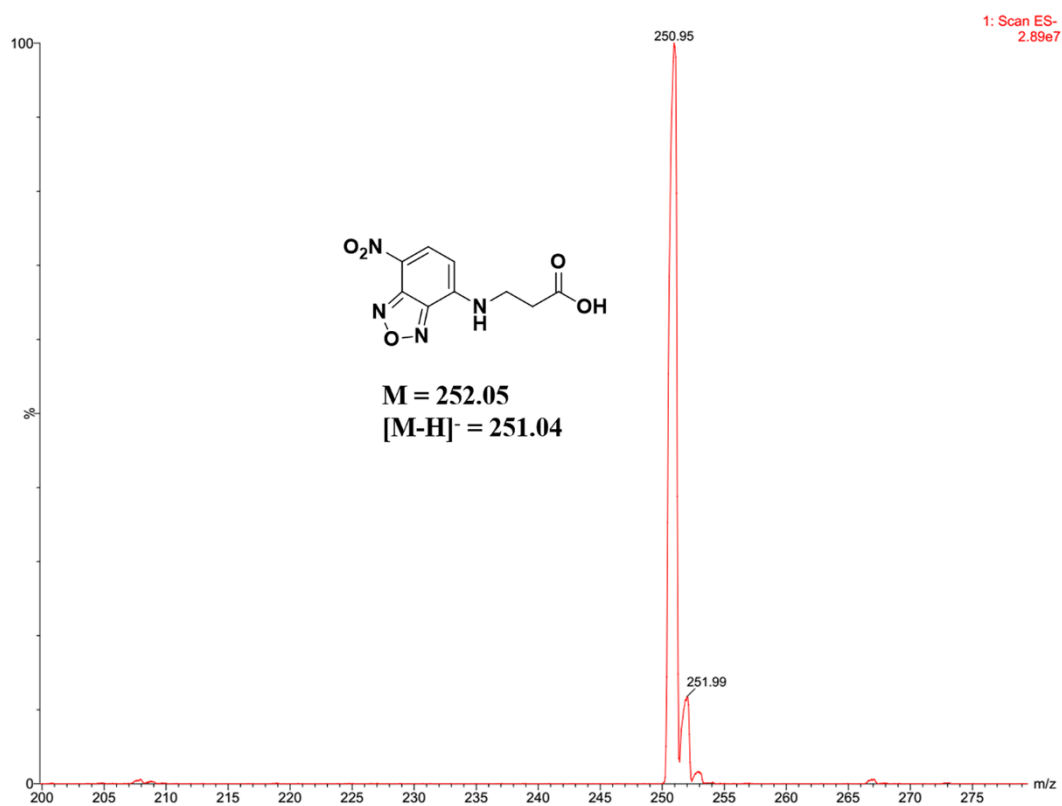

Figure S2. Mass spectrum of NBD- $\beta$ -Alanine ( $M/Z = 250.95$ ).

# SUPPORTING INFORMATION

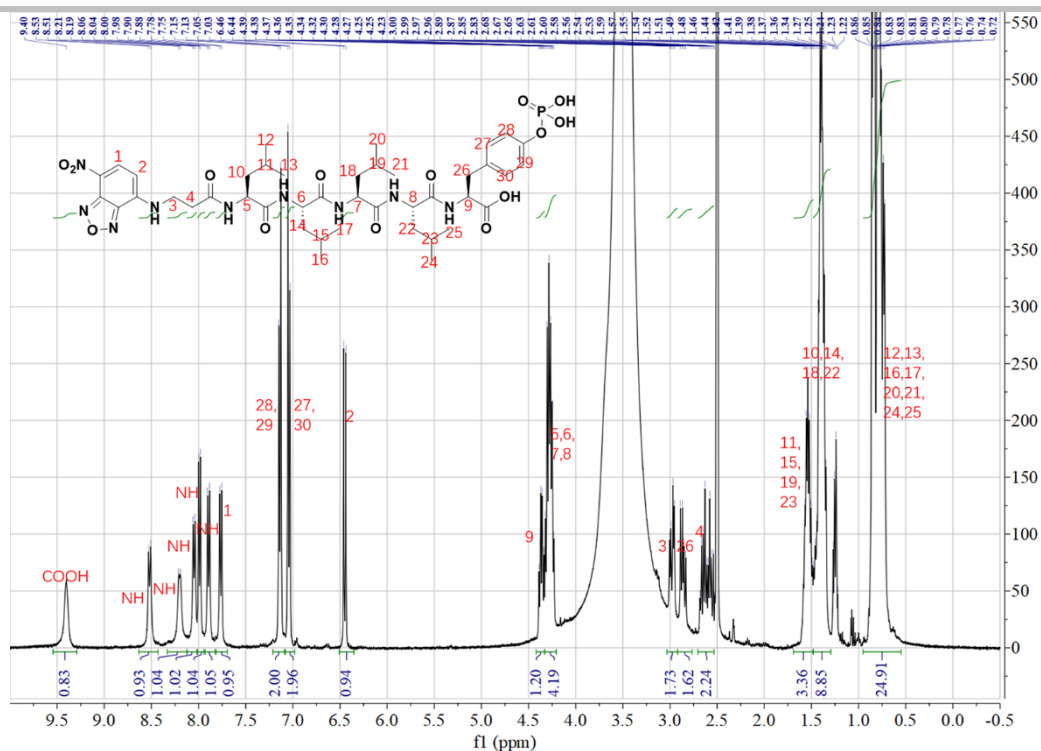

Figure S3.  $^1\text{H}$  NMR spectrum of 1Lp.

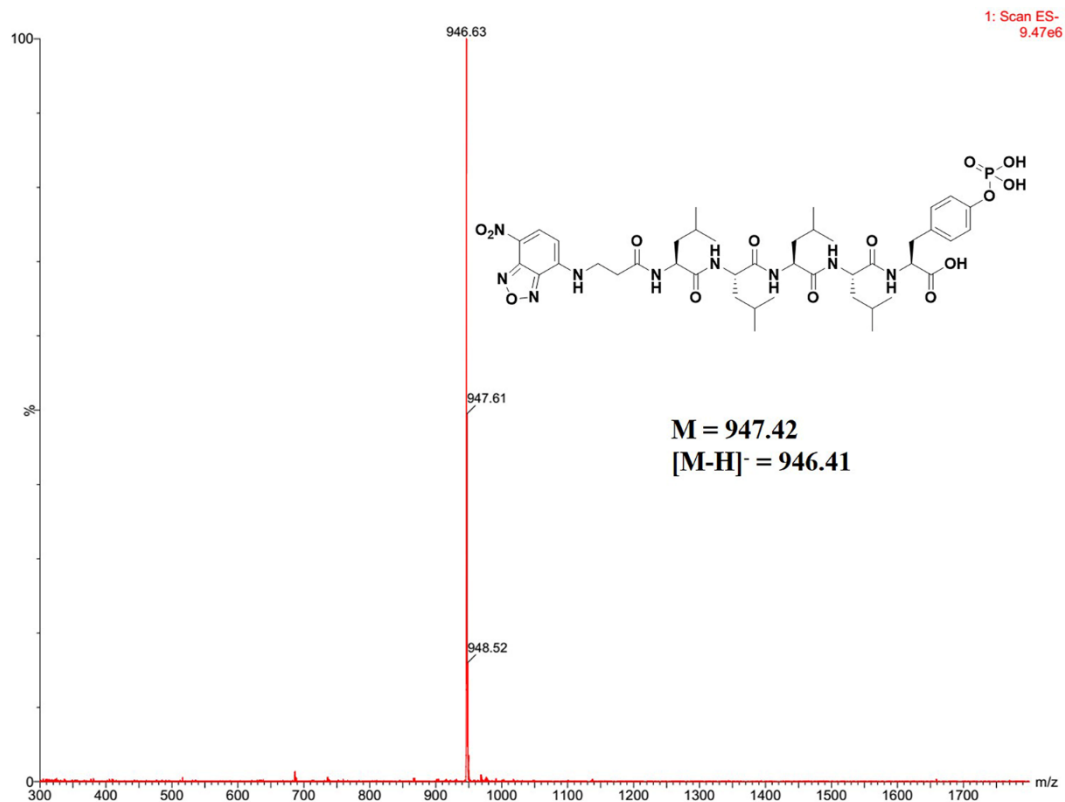

Figure S4. Mass spectrum of 1Lp ( $M/Z = 946.63$ ).



# SUPPORTING INFORMATION

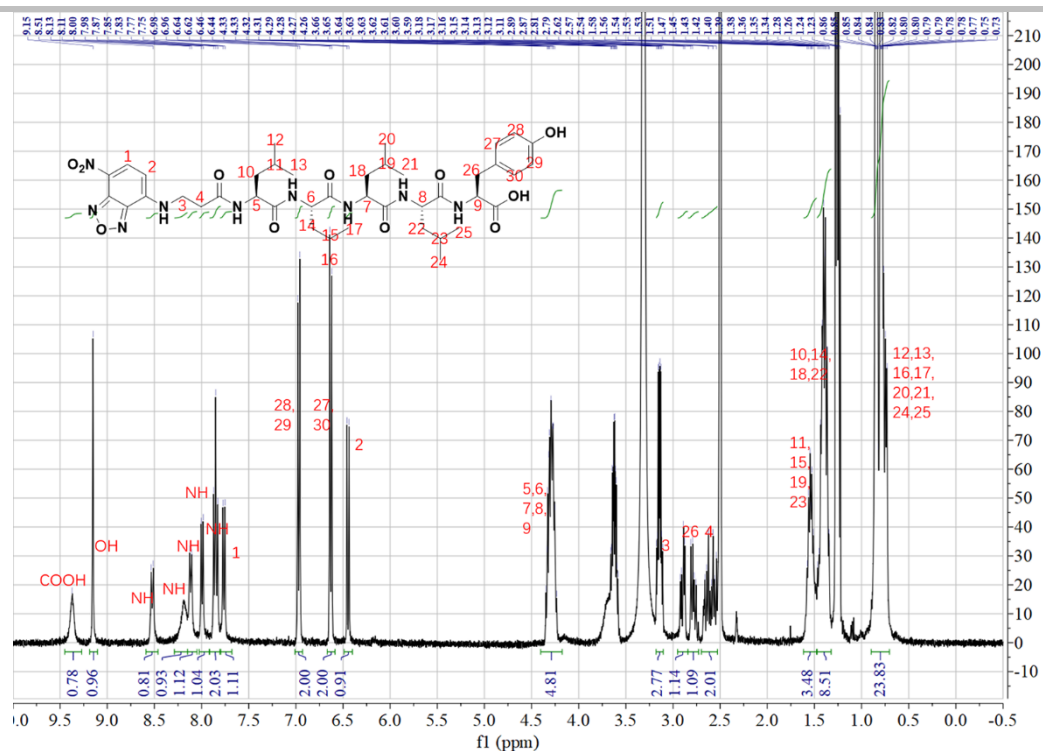

Figure S5. <sup>1</sup>H NMR spectrum of 1L.

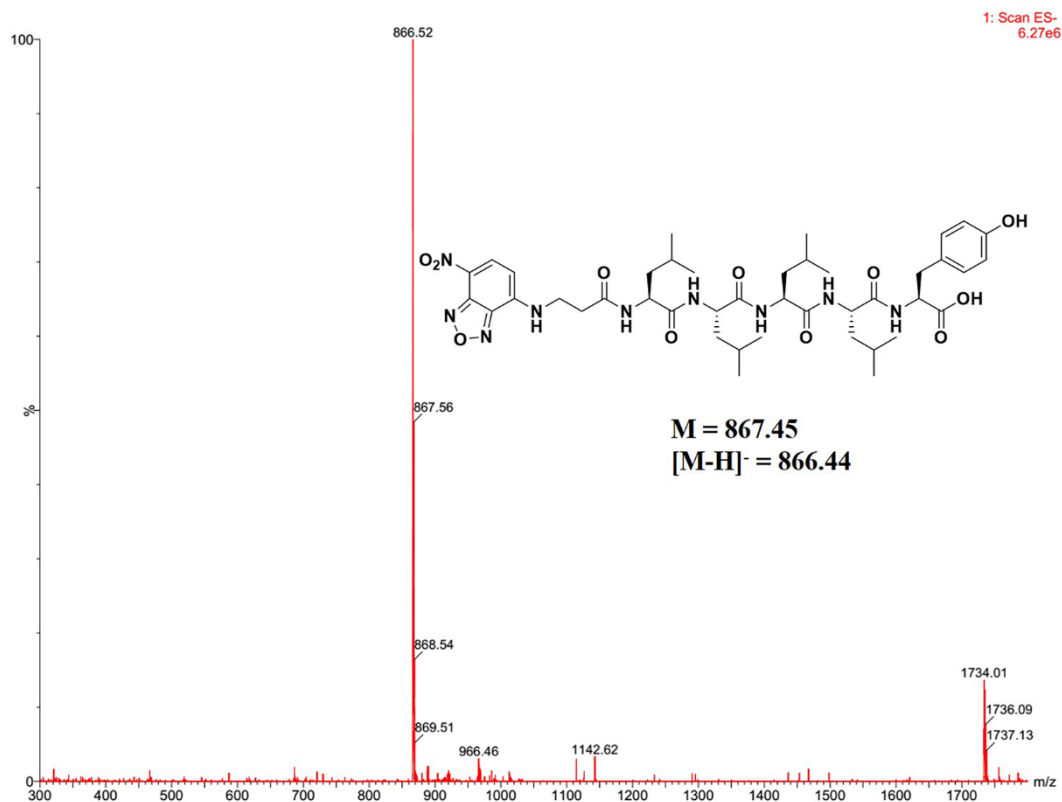

Figure S6. Mass spectrum of 1L (M/Z = 866.52).

# SUPPORTING INFORMATION

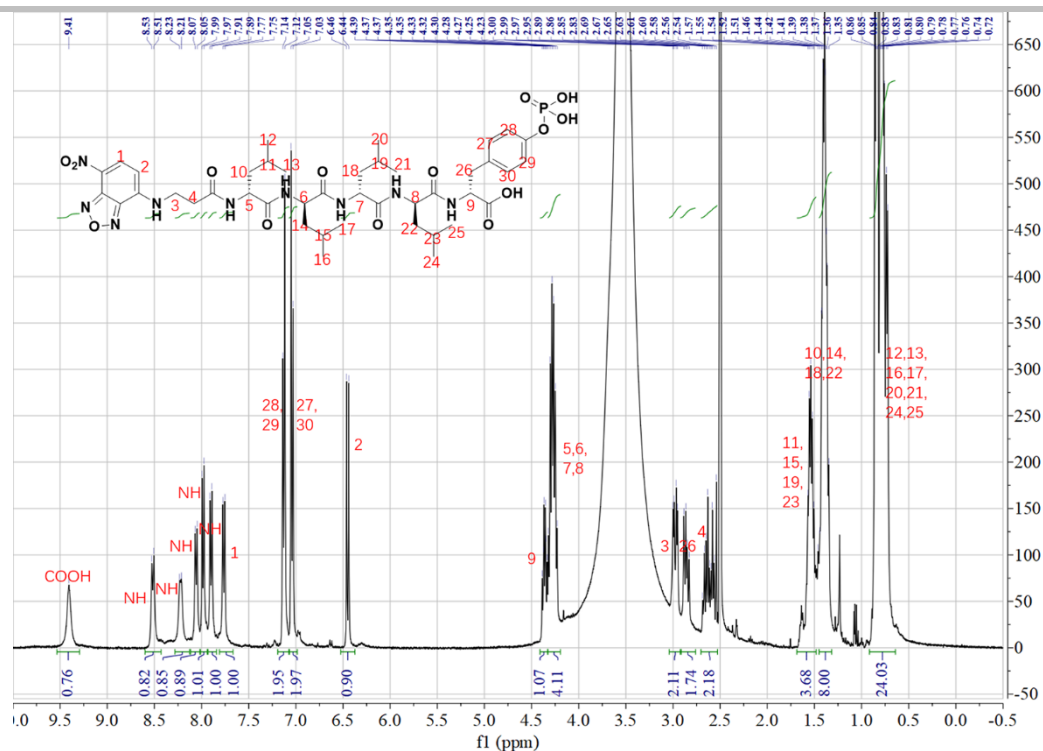

Figure S7.  $^1\text{H}$  NMR spectrum of 1Dp.

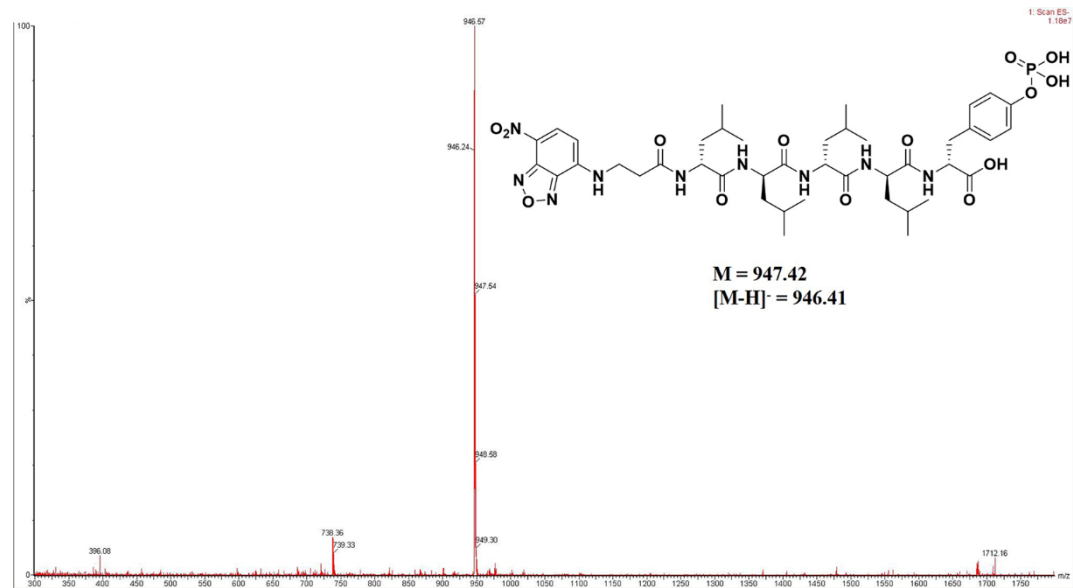

Figure S8. Mass spectrum of 1Dp ( $M/Z = 946.57$ ).

# SUPPORTING INFORMATION

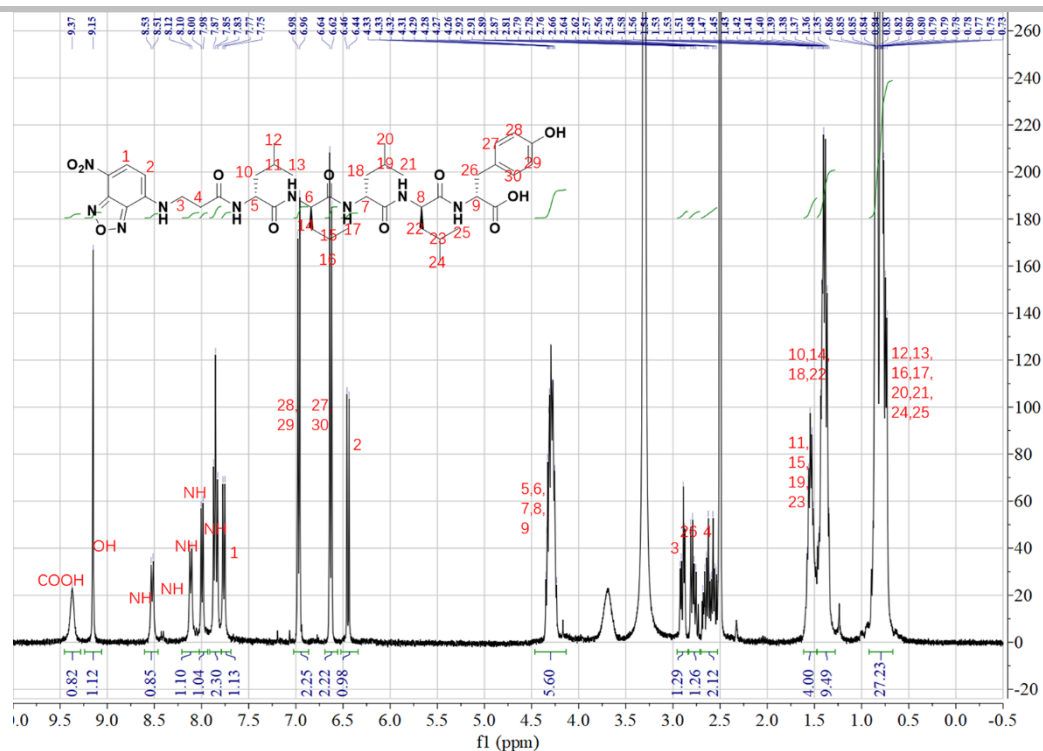

Figure S9. <sup>1</sup>H NMR spectrum of 1D.

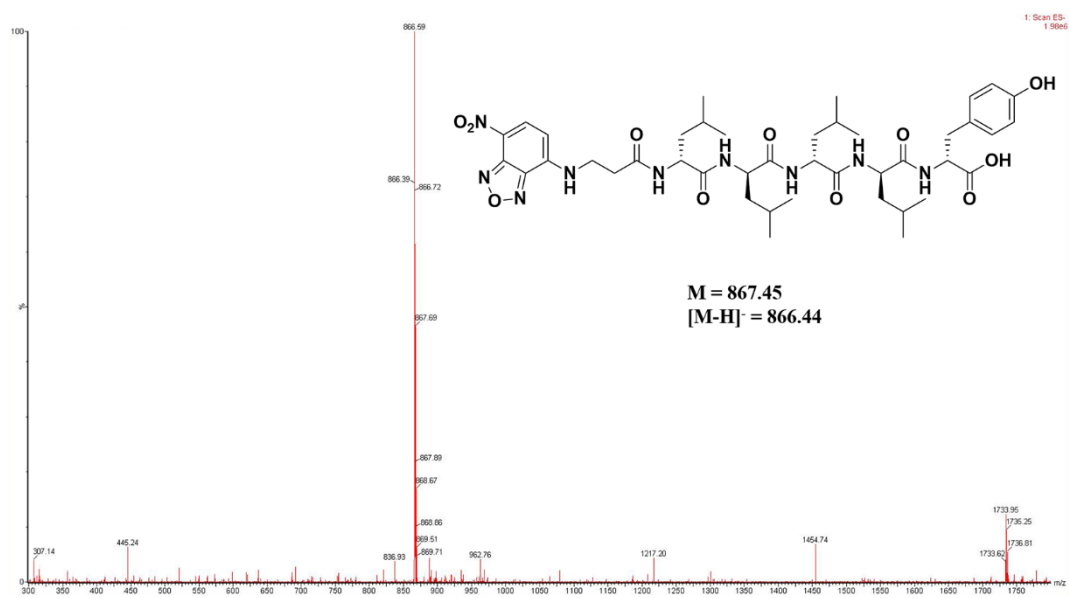

Figure S10. Mass spectrum of 1D (M/Z = 866.59).

# SUPPORTING INFORMATION

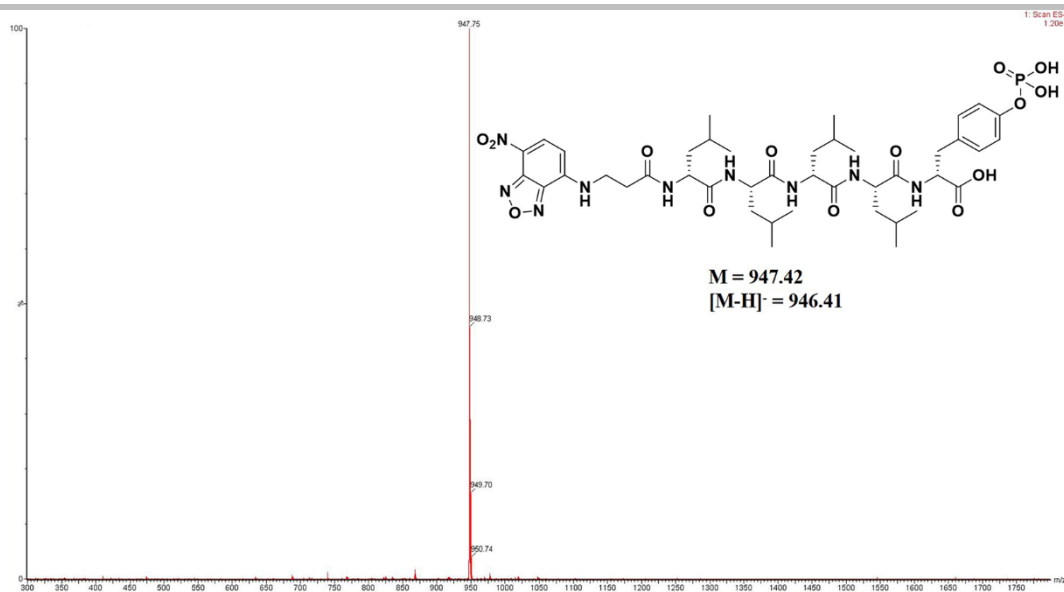

Figure S11. Mass spectrum of 1DLp ( $M/Z = 947.75$ ).

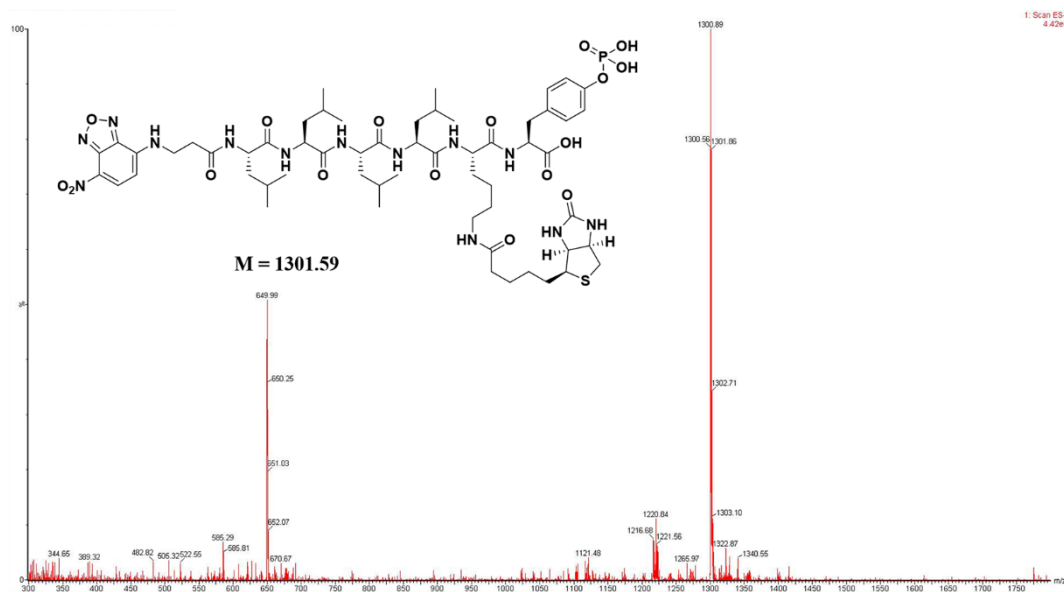

Figure S12. Mass spectrum of 2Lp ( $M/Z = 1301.86$ ).

## SUPPORTING INFORMATION

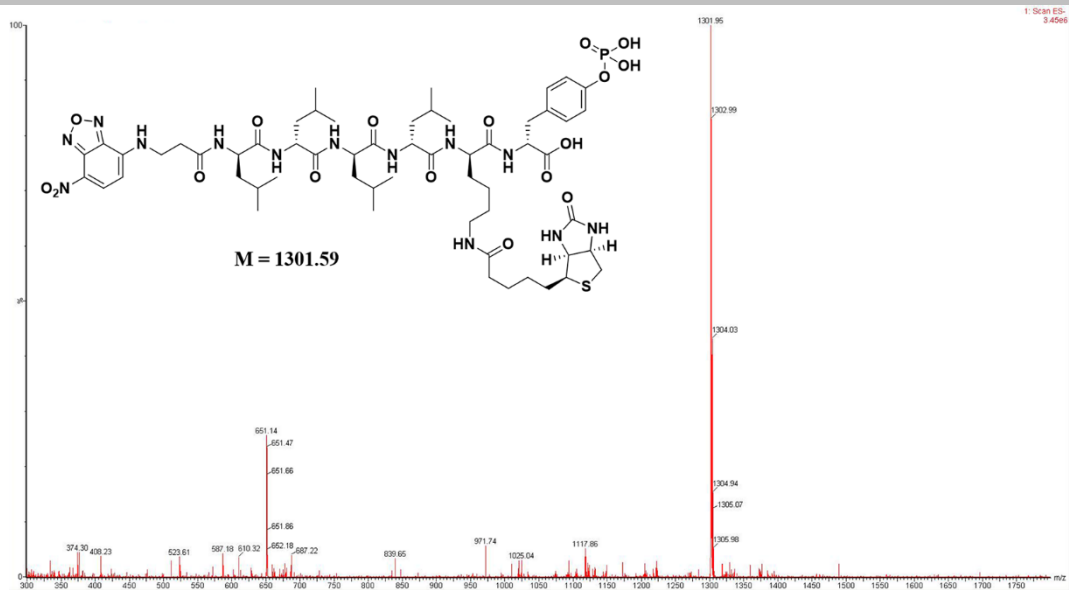

**Figure S13.** Mass spectrum of **2Dp** ( $M/Z = 1301.95$ ).

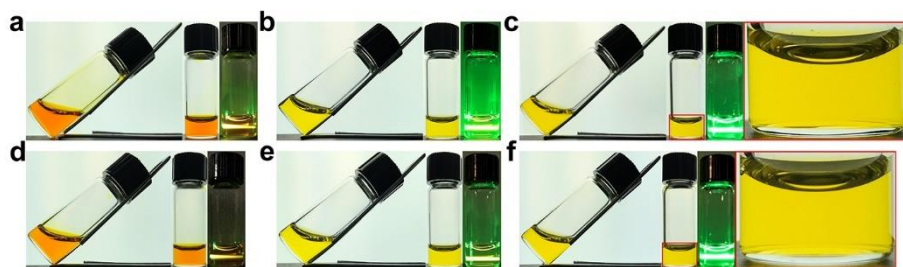

**Figure S14.** Optical photos of a) 10 mM **1Lp**, b) 200  $\mu$ M **1Lp**, c) 200  $\mu$ M **1Lp** after dephosphorylation by ALP (0.5 U/mL) for 24 h. Optical photos of d) 10 mM **1Dp**, e) 200  $\mu$ M **1Dp**, f) 200  $\mu$ M **1Dp** after dephosphorylation by ALP (0.5 U/mL) for 24 h.

## SUPPORTING INFORMATION

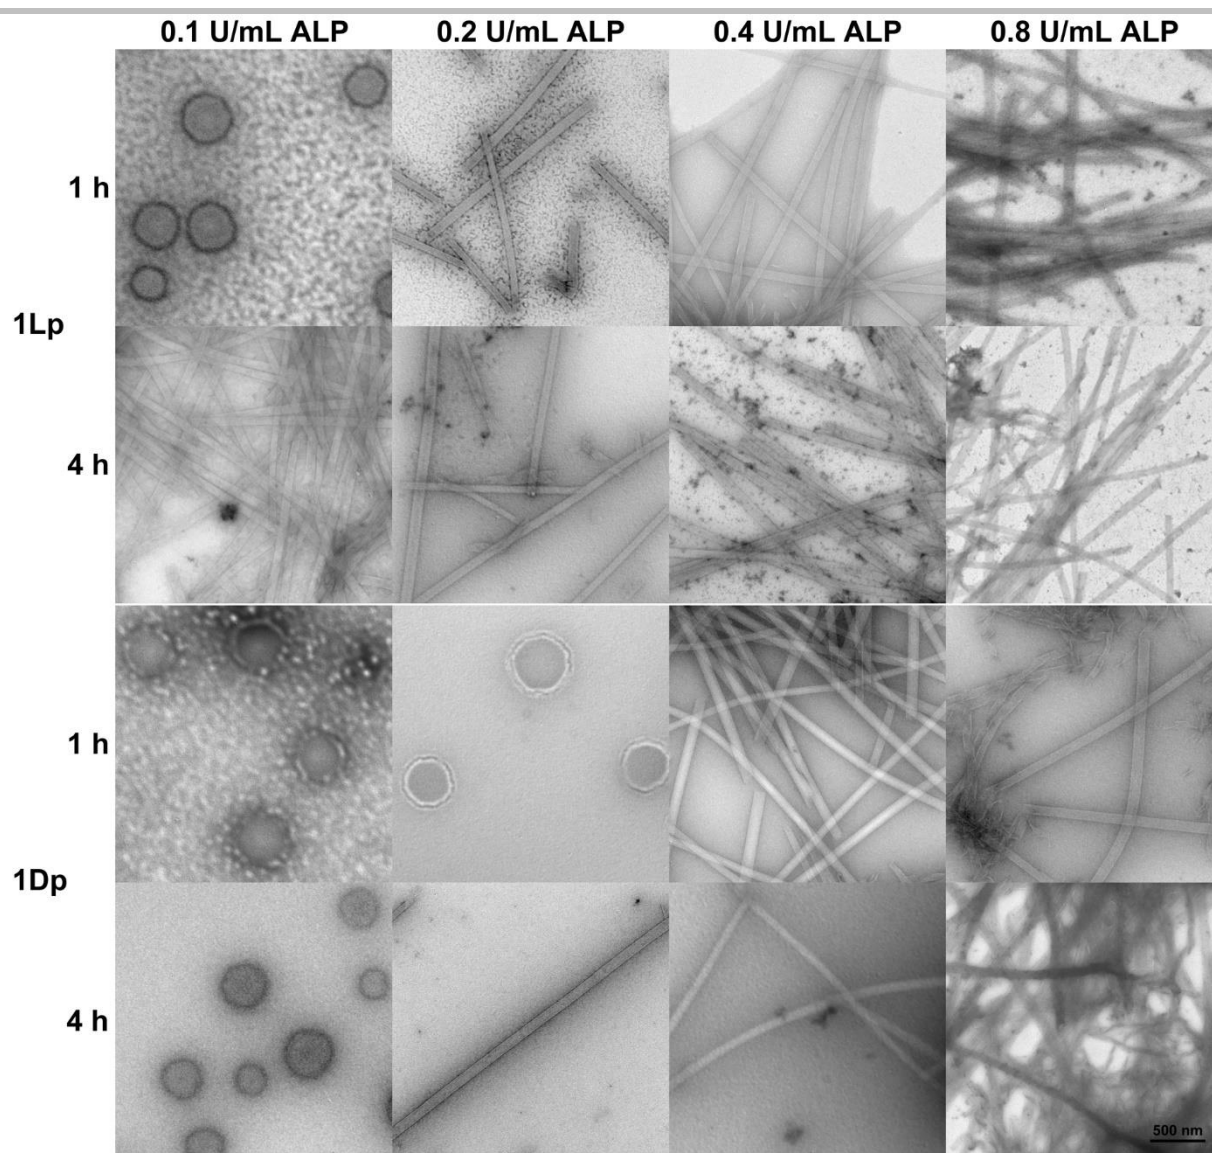

**Figure S15.** Transmission electron microscopes (TEM) images of **1Lp** and **1Dp** (200  $\mu$ M, PBS) after dephosphorylation by ALP (0.1, 0.2, 0.4, and 0.8 U/mL) for 1 h and 4 h.

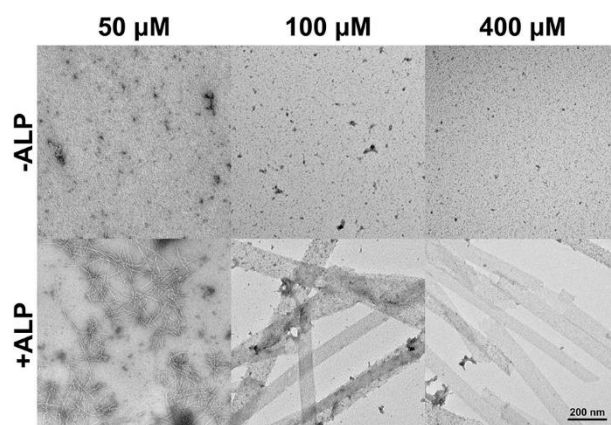

**Figure S16.** Transmission electron microscopes (TEM) images of **1Dp** (50  $\mu$ M, 100  $\mu$ M, and 400  $\mu$ M, PBS) before and after dephosphorylation by ALP (0.5 U/mL) for 24 h.

# SUPPORTING INFORMATION

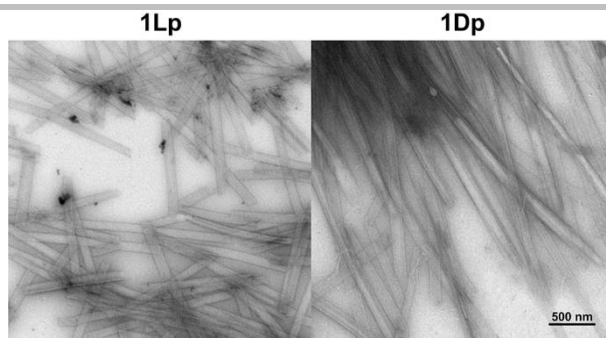

**Figure S17.** Transmission electron microscopes (TEM) images of **1Lp** and **1Dp** (200  $\mu\text{M}$ , PBS) after dephosphorylation by ALP (0.1 U/mL) for 24 h.

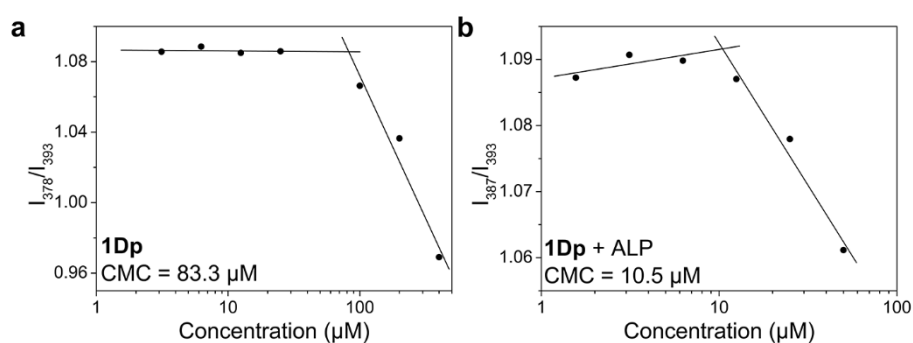

**Figure S18.** Critical micelle concentration (CMC) of a) **1Dp** (PBS) and b) **1Dp** + ALP (PBS, 37°C, 24 h).

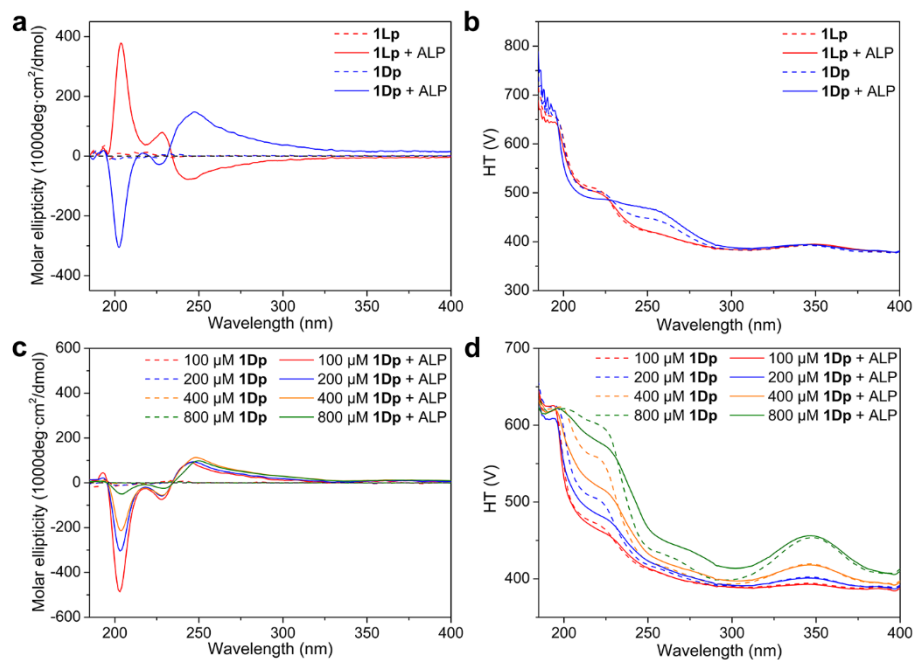

**Figure S19.** a) Circular dichroism (CD) spectra of **1Lp** and **1Dp** (200  $\mu\text{M}$ , PBS) before and after dephosphorylation by 0.5 U/mL of ALP for 24 h. b) HT voltages of a). c) Circular dichroism (CD) spectra of **1Dp** (PBS) at different concentrations before and after dephosphorylation by 0.5 U/mL of ALP for 24 h. d) HT voltages of c).

## SUPPORTING INFORMATION

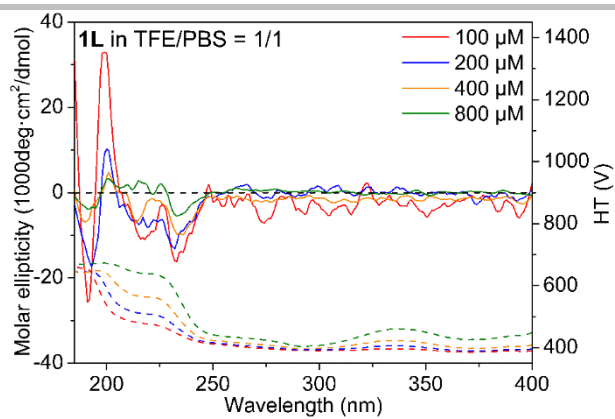

**Figure S20.** Circular dichroism (CD) spectra (solid line) and HT voltages (dash line) of **1L** in TFE/PBS = 1/1.

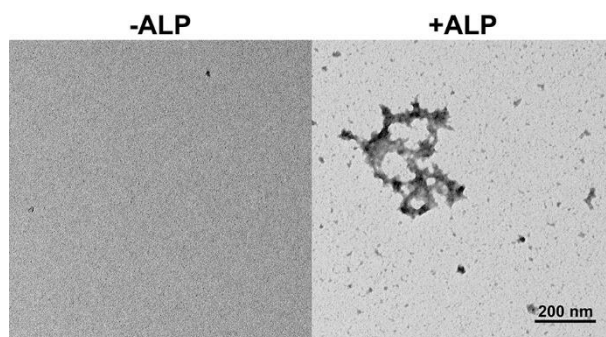

**Figure S21.** Transmission electron microscopes (TEM) images of **1DLp** (200  $\mu\text{M}$ , PBS) before and after dephosphorylation by ALP (0.5 U/mL) for 24 h.

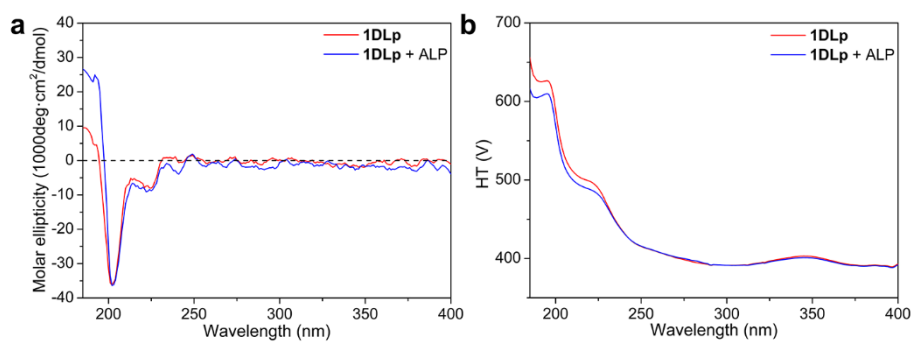

**Figure S22.** a) Circular dichroism (CD) spectra of **1DLp** (200  $\mu\text{M}$ , PBS) before and after dephosphorylation by 0.5 U/mL of ALP for 24 h. b) HT voltages of a).



## SUPPORTING INFORMATION

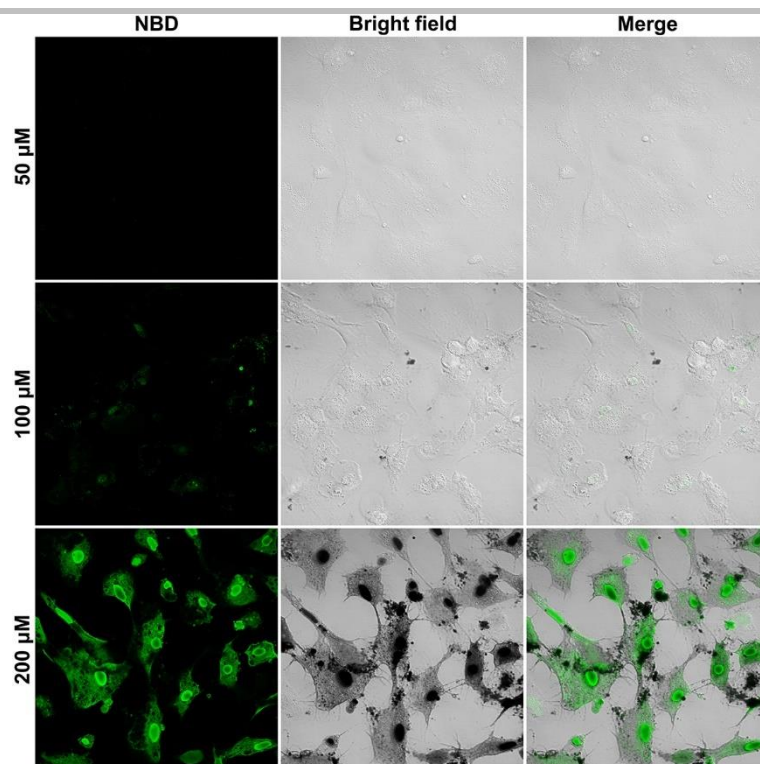

**Figure S23.** Confocal laser scanning microscopy (CLSM) images of SJSA-1 cells after being treated by **1Lp** (50  $\mu\text{M}$ , 100  $\mu\text{M}$ , or 200  $\mu\text{M}$ ) for 4 h.

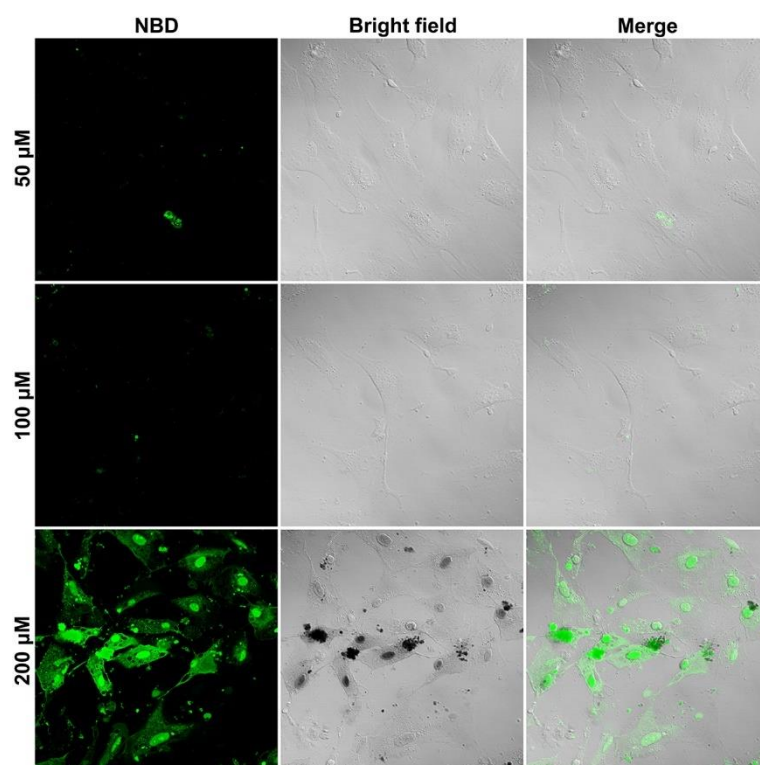

**Figure S24.** Confocal laser scanning microscopy (CLSM) images of SJSA-1 cells after being treated by **1Dp** (50  $\mu\text{M}$ , 100  $\mu\text{M}$ , or 200  $\mu\text{M}$ ) for 4 h.

## SUPPORTING INFORMATION

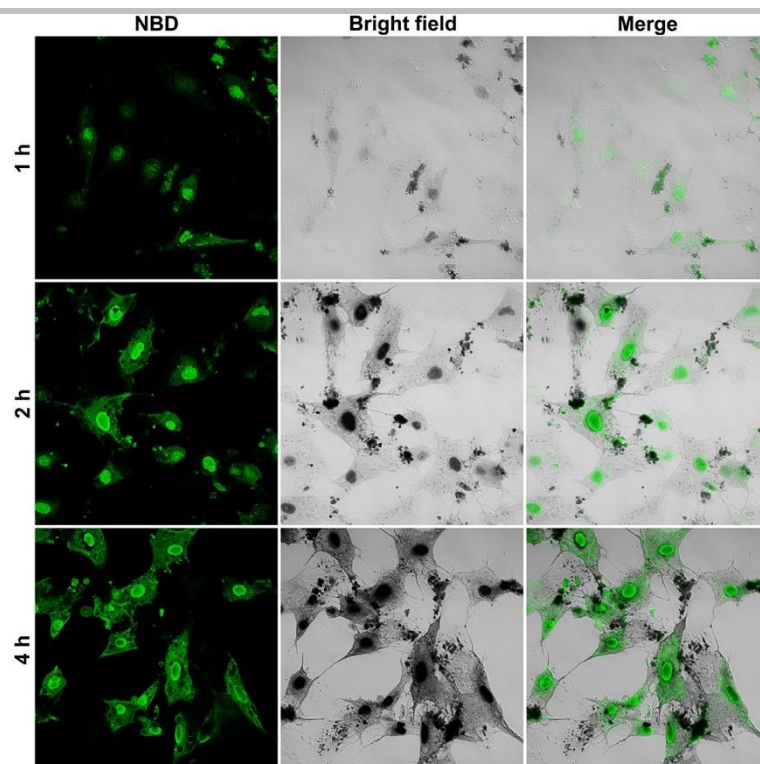

**Figure S25.** Confocal laser scanning microscopy (CLSM) images of SJSA-1 cells after being treated by **1Lp** (200  $\mu$ M) for 1 h, 2 h, or 4 h.

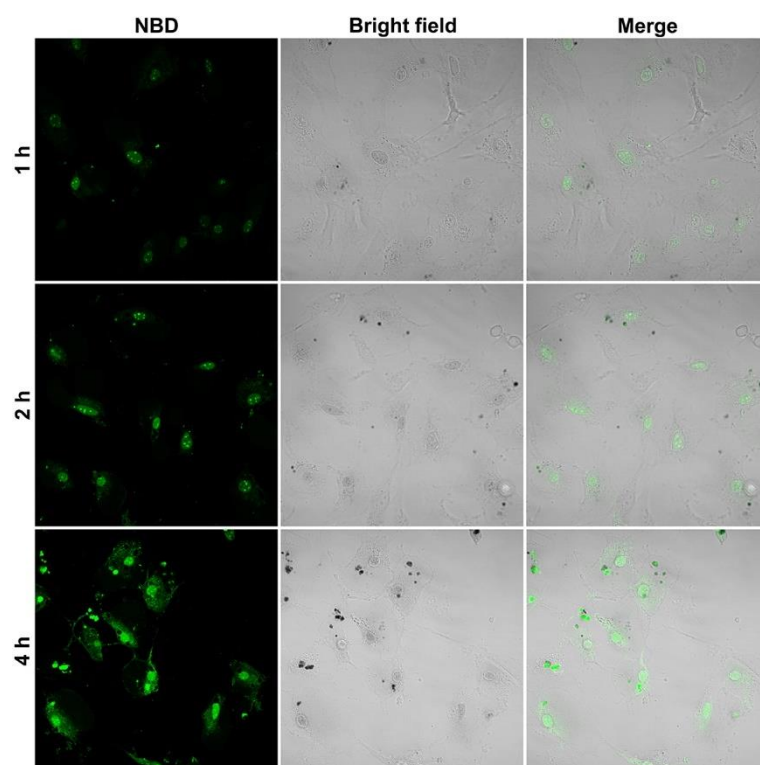

**Figure S26.** Confocal laser scanning microscopy (CLSM) images of SJSA-1 cells after being treated by **1Dp** (200  $\mu$ M) for 1 h, 2 h, or 4 h.

## SUPPORTING INFORMATION

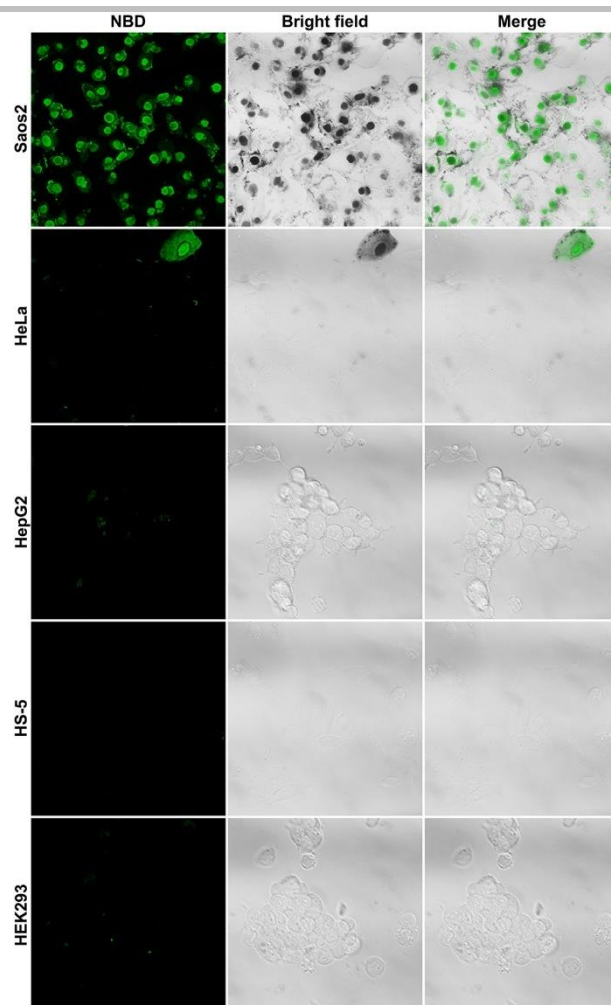

**Figure S27.** Confocal laser scanning microscopy (CLSM) images of Saos2, HeLa, HepG2, HS-5, or HEK293 cells after being treated by **1Lp** (200  $\mu$ M) for 4 h.

## SUPPORTING INFORMATION

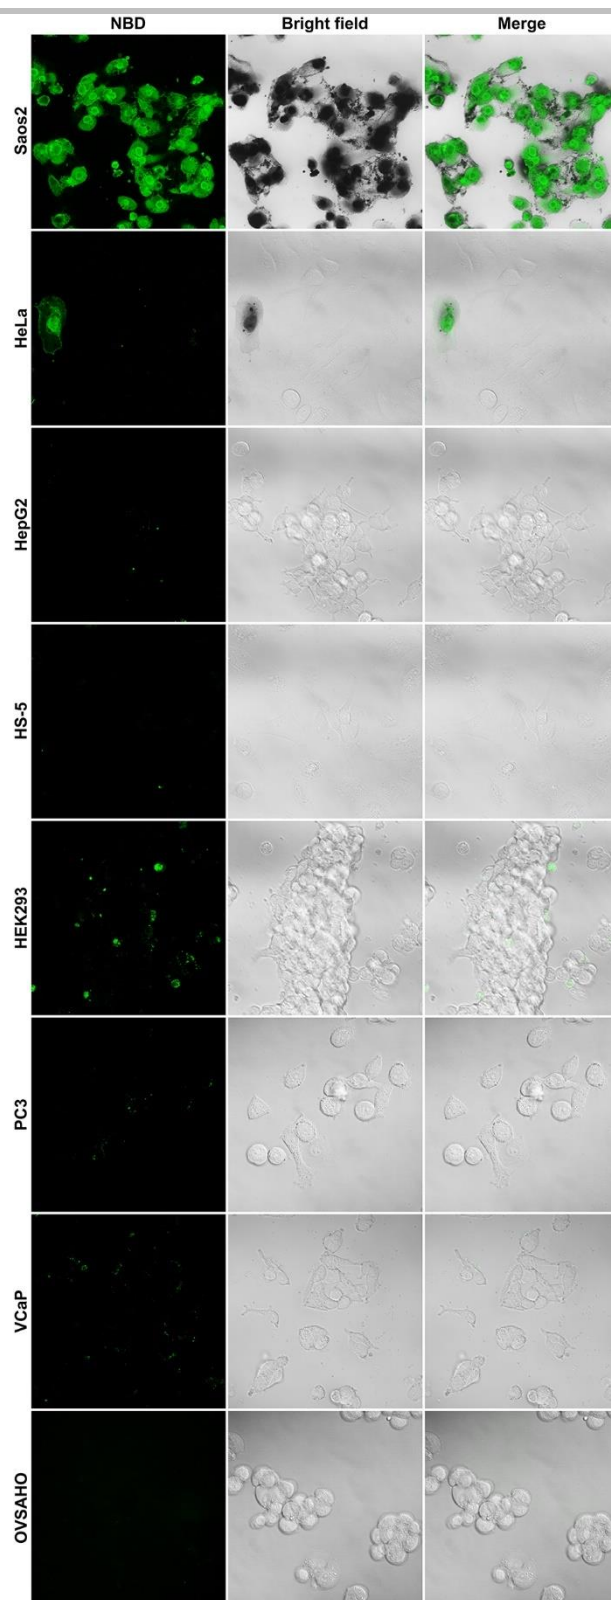

**Figure S28.** Confocal laser scanning microscopy (CLSM) images of Saos2, HeLa, HepG2, HS-5, HEK293, PC3, VCaP, and OVSAHO cells after being treated by 1Dp (200  $\mu$ M) for 4 h.

## SUPPORTING INFORMATION

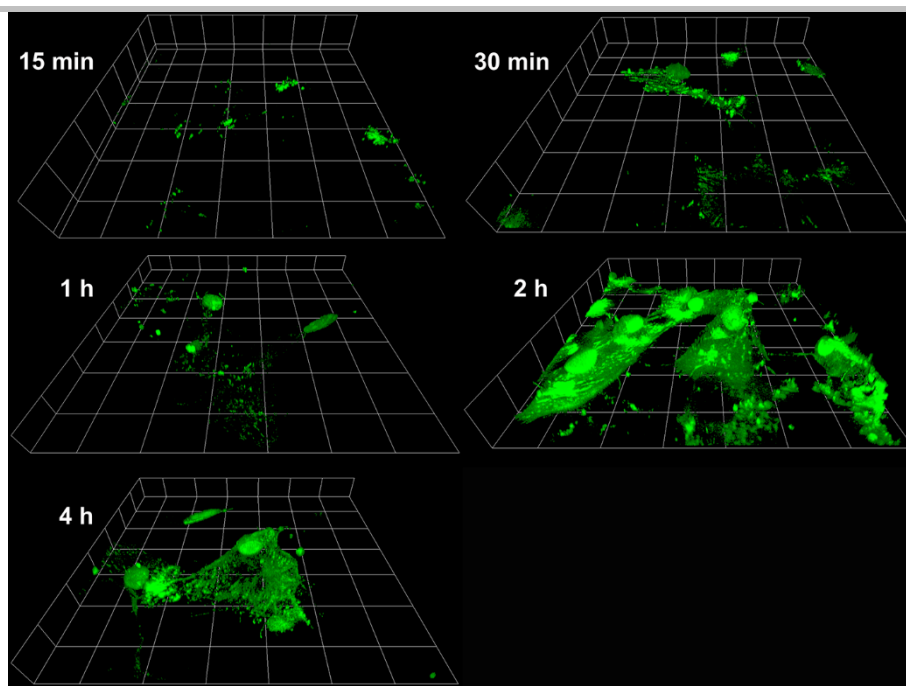

**Figure S29.** 3D Confocal laser scanning microscopy (CLSM) images of SJSA-1 cells after being treated by 1Lp (200  $\mu$ M) for 15 min, 30 min, 1 h, 2 h, or 4 h.

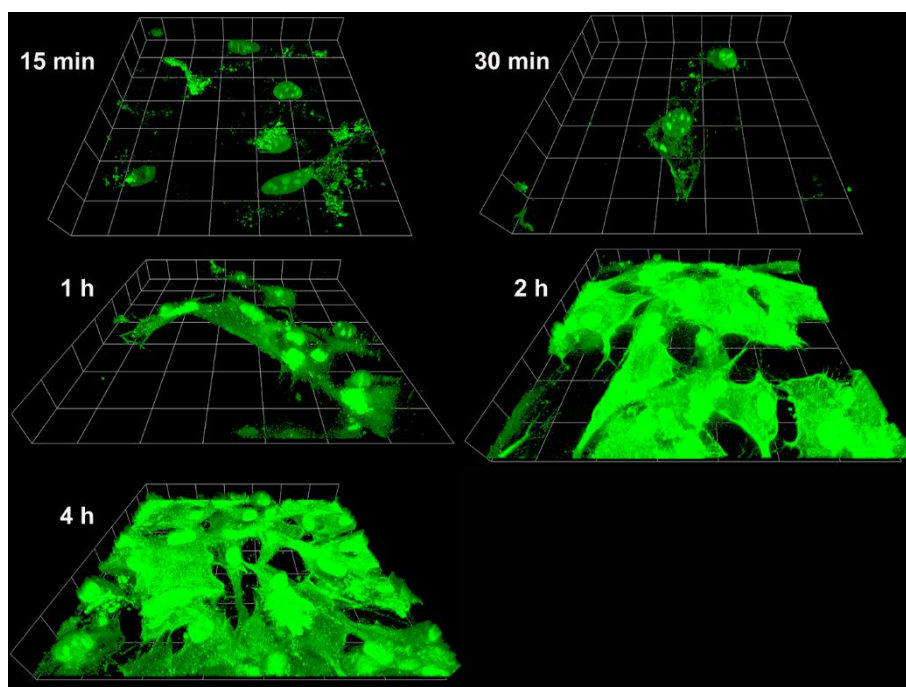

**Figure S30.** 3D Confocal laser scanning microscopy (CLSM) images of SJSA-1 cells after being treated by 1Dp (200  $\mu$ M) for 15 min, 30 min, 1 h, 2 h, or 4 h.

## SUPPORTING INFORMATION

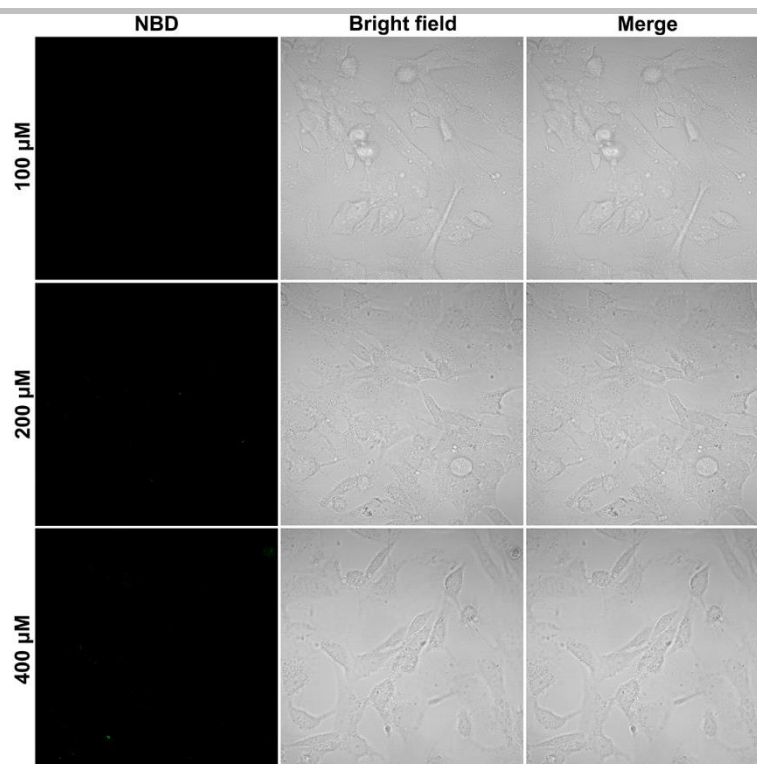

**Figure S31.** Confocal laser scanning microscopy (CLSM) images of SJSA-1 cells after being treated by **1DLp** (100  $\mu\text{M}$ , 200  $\mu\text{M}$ , or 400  $\mu\text{M}$ ) for 4 h.

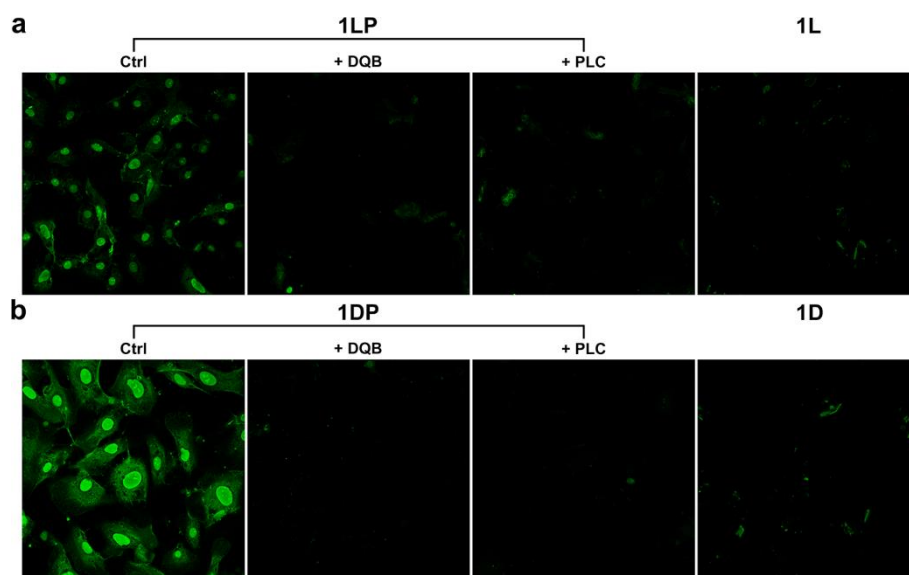

**Figure S32.** a) Confocal laser scanning microscopy (CLSM) images of SJSA-1 cells after being treated by **1Lp** (200  $\mu\text{M}$ ) in absence (Ctrl) or presence of DQB (5  $\mu\text{M}$ ) or PLC (0.2 U/mL, pretreat for 24 h), or **1L** for 4 h. b) CLSM images of SJSA-1 cells after being treated by **1Dp** (200  $\mu\text{M}$ ) in absence (Ctrl) or presence of DQB (5  $\mu\text{M}$ ) or PLC (0.2 U/mL, pretreat for 24 h), or **1D** for 4 h.

## SUPPORTING INFORMATION

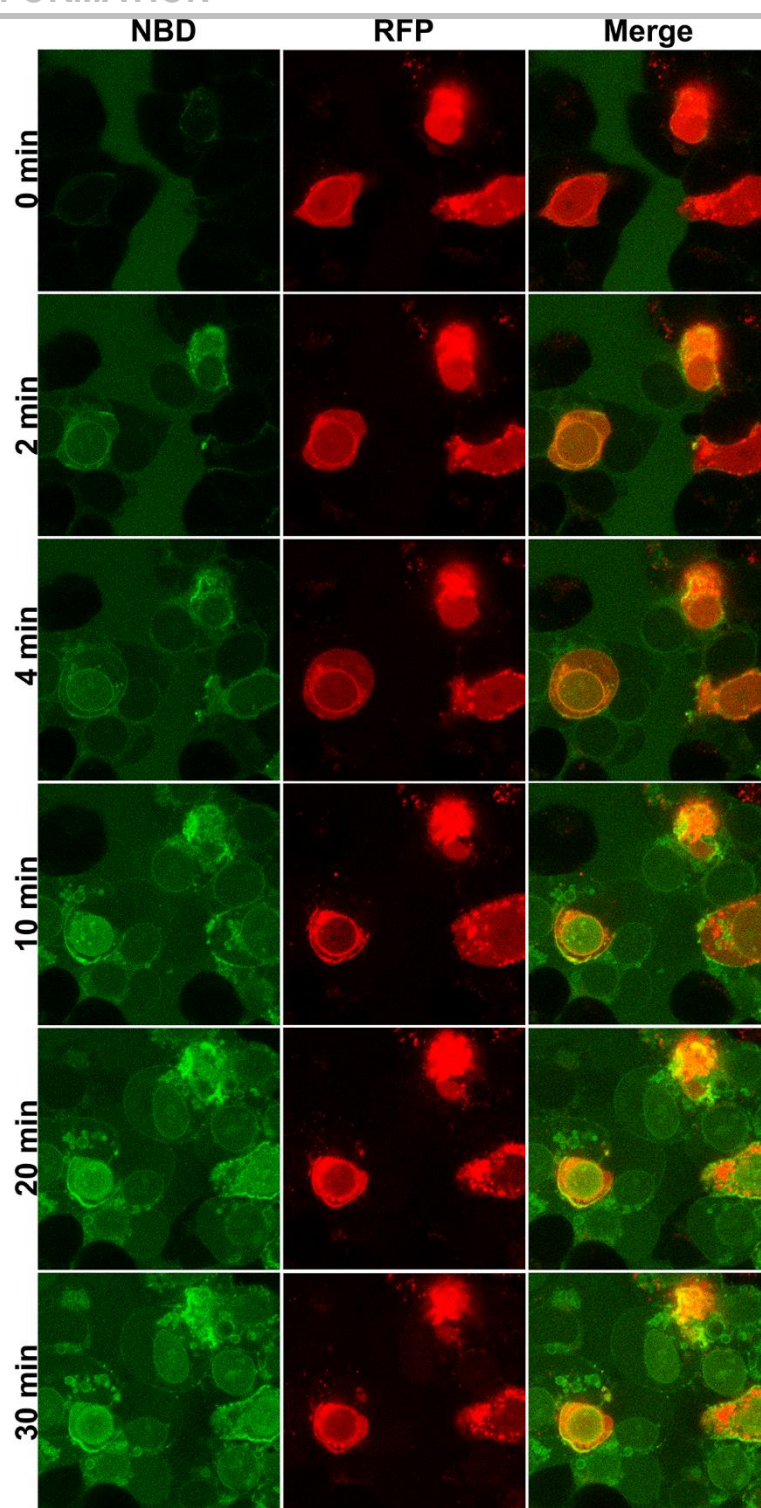

**Figure S33.** Time-dependent CLSM images of TNAP-RFP transfected HEK293 cells treated by 1Lp (200 μM) (Movie 9).

## SUPPORTING INFORMATION

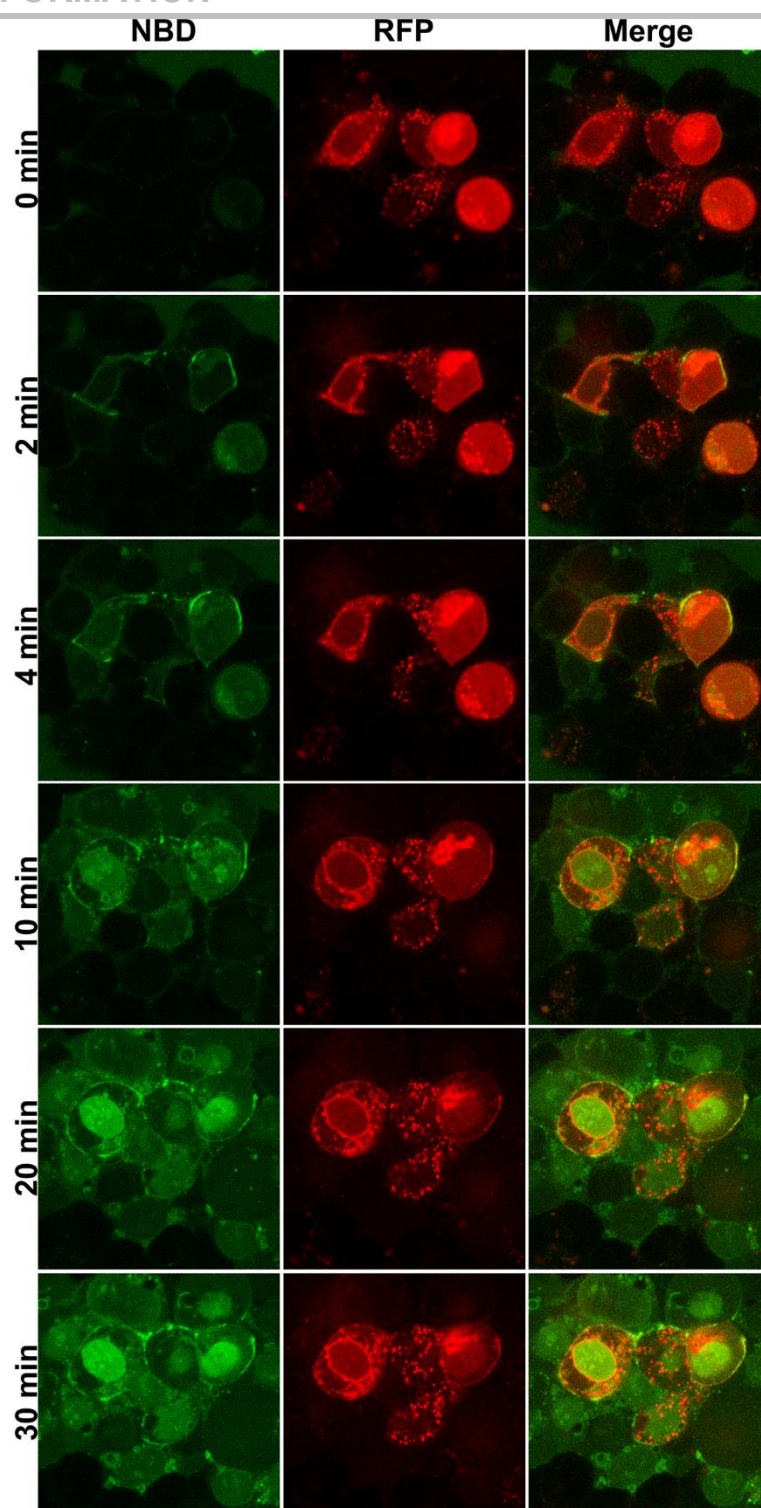

**Figure S34.** Time-dependent CLSM images of TNAP-RFP transfected HEK293 cells treated by **1Dp** (200  $\mu$ M) (Movie 10).



## SUPPORTING INFORMATION

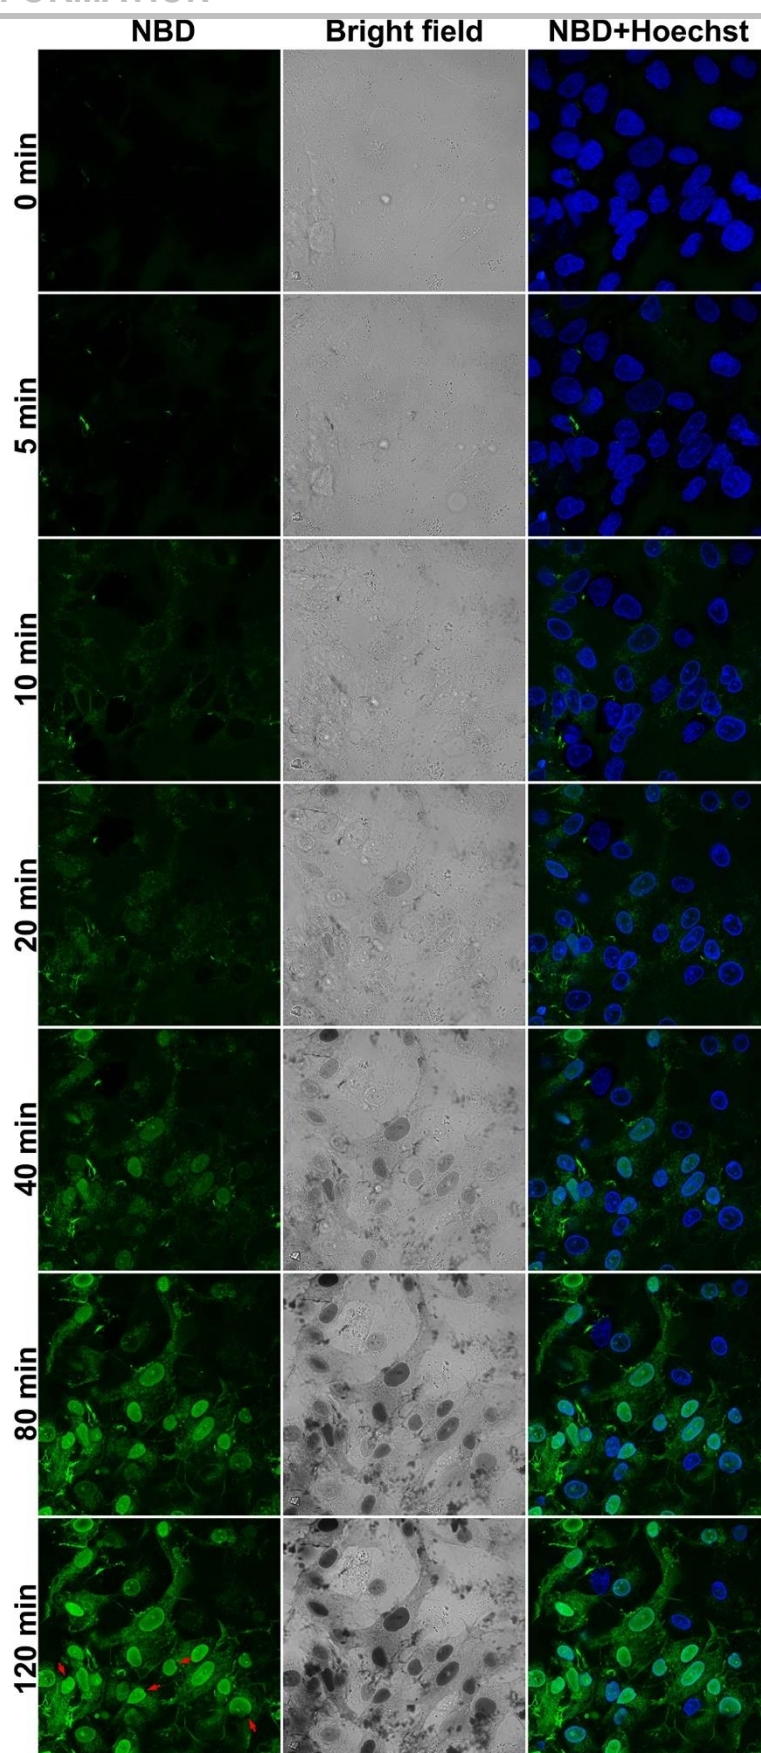

**Figure S35.** Time-dependent CLSM images of SJSA-1 after incubating with 1Lp (200  $\mu$ M) (Movie 1). The red arrows show the disruption of nucleus membrane.

## SUPPORTING INFORMATION

---

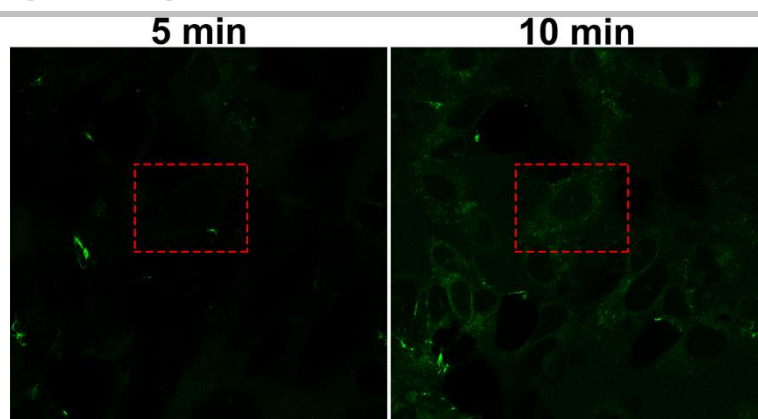

**Figure S36.** CLSM images of SJSA-1 cells after incubating with **1Lp** (200  $\mu$ M) for 5 min and 10 min (Movie 1). The red dash squares show the exemplified cell. The cell exhibits fluorescence in the cytoplasm after 5 min incubation and in the cell nucleus after 10 min incubation.

# SUPPORTING INFORMATION

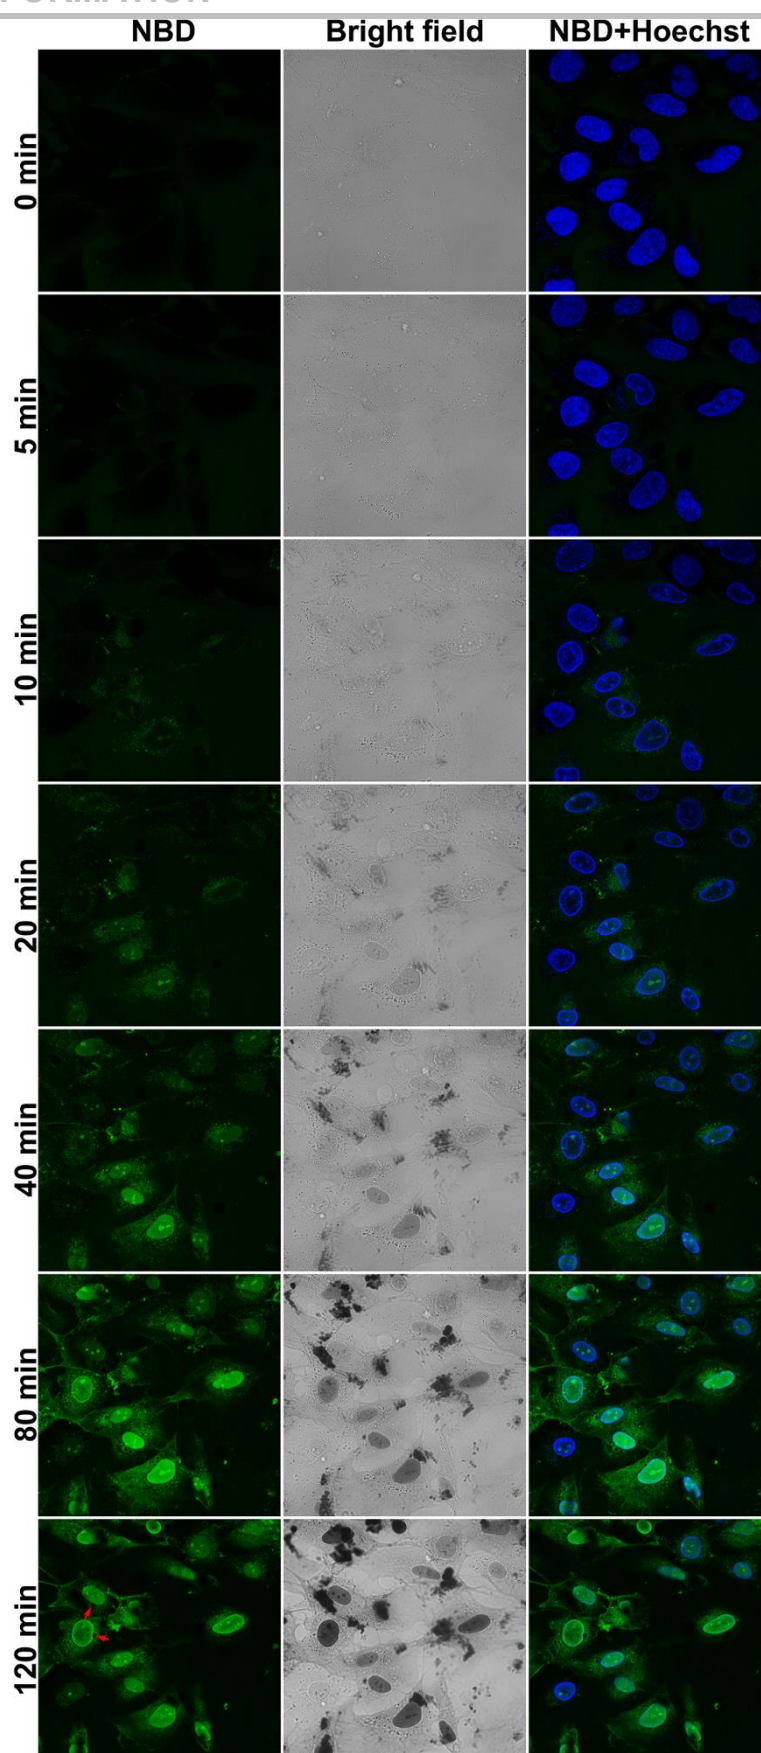

**Figure S37.** Time-dependent CLSM images of SJSA-1 after incubating with **1Dp** (200  $\mu$ M) (Movie 2). The red arrows show the disruption of nucleus membrane.

## SUPPORTING INFORMATION

---

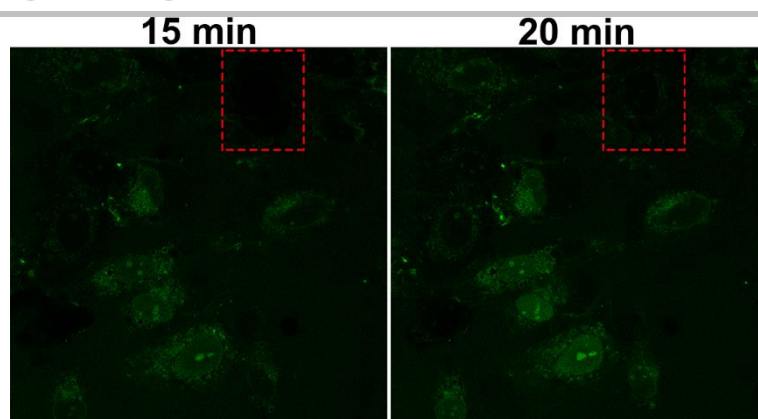

**Figure S38.** CLSM images of SJS-A1 cells after incubating with **1Dp** (200  $\mu$ M) for 15 min and 20 min (Movie 2). The red dash squares show the exemplified cell. The cell exhibits fluorescence in the cytoplasm after 15 min incubation and in the cell nucleus after 20 min incubation.

## SUPPORTING INFORMATION

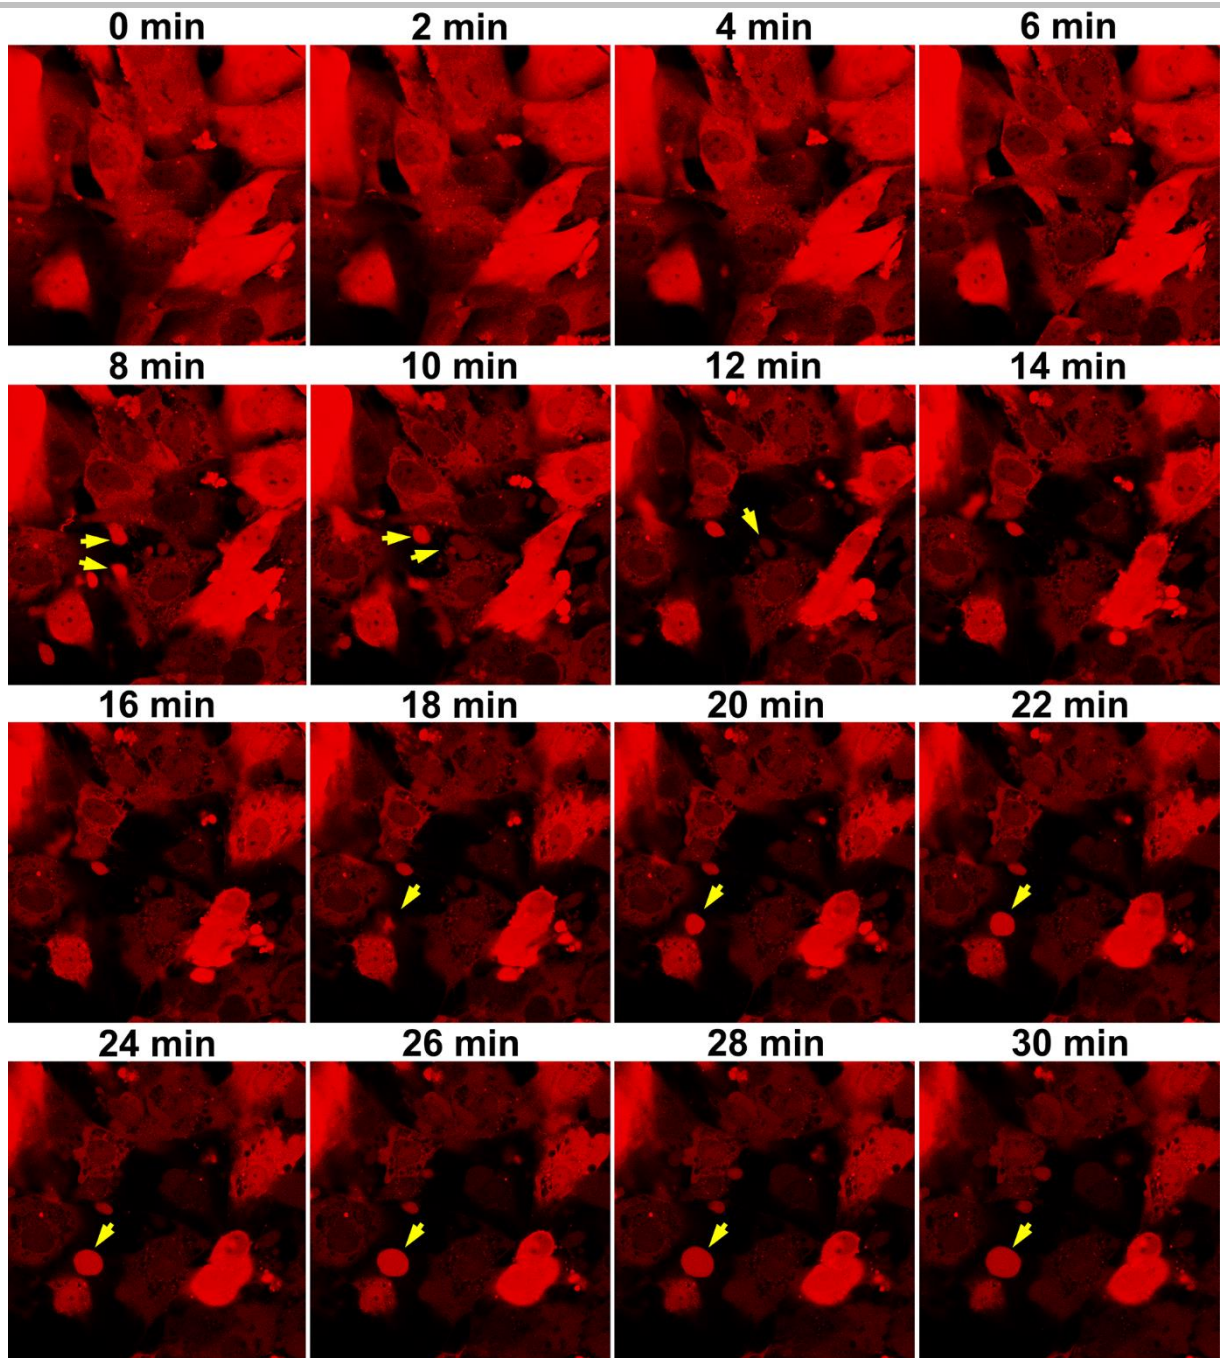

**Figure S39.** CLSM images of RFP-expressing SJSA-1 after incubating with 1Lp (200  $\mu$ M) for different time (Movie 7). The yellow arrows show the disruption of cell membranes and release of cytoplasm.

## SUPPORTING INFORMATION

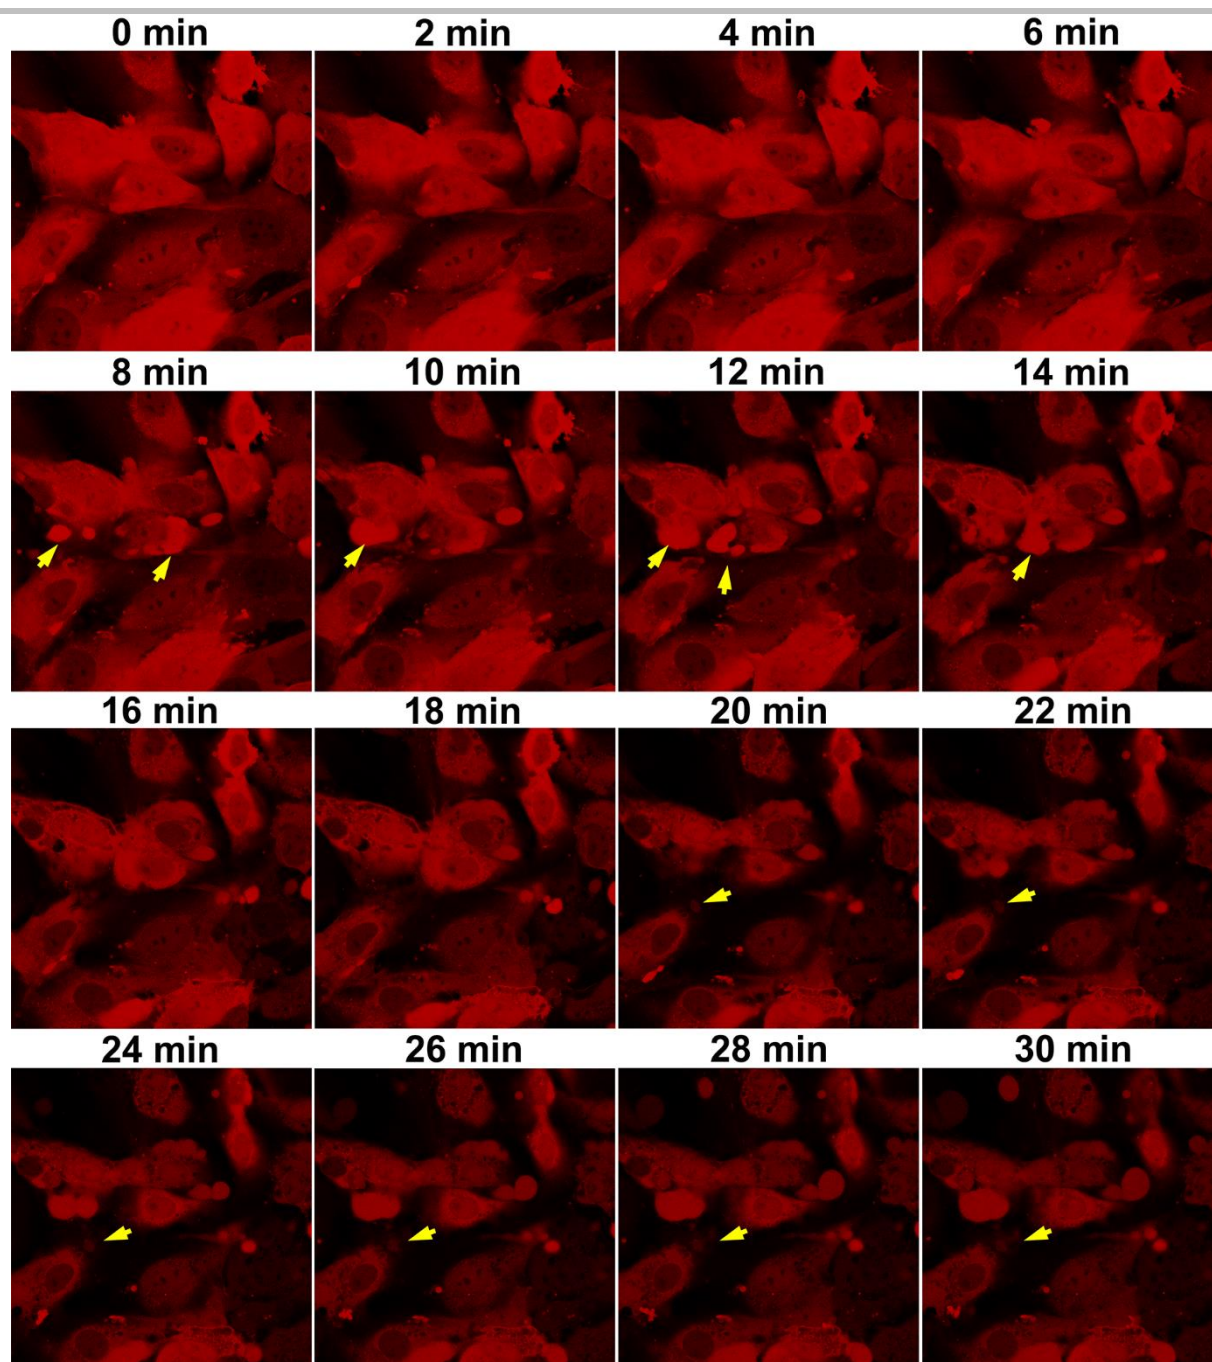

**Figure S40.** CLSM images of RFP-expressing SJSA-1 after incubating with 1Dp (200  $\mu$ M) for different time (Movie 8). The yellow arrows show the disruption of cell membranes and release of cytoplasm.

## SUPPORTING INFORMATION

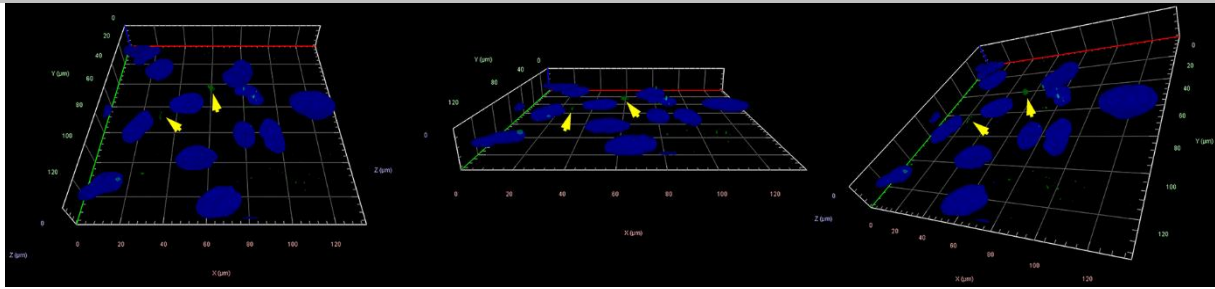

**Figure S41.** 3D CLSM images of SJS-A1 after incubated with **1Lp** ( $200\ \mu\text{M}$ ) for 3 min (Movie 3). The yellow arrows show the NBD fluorescence on the contact points of cells.

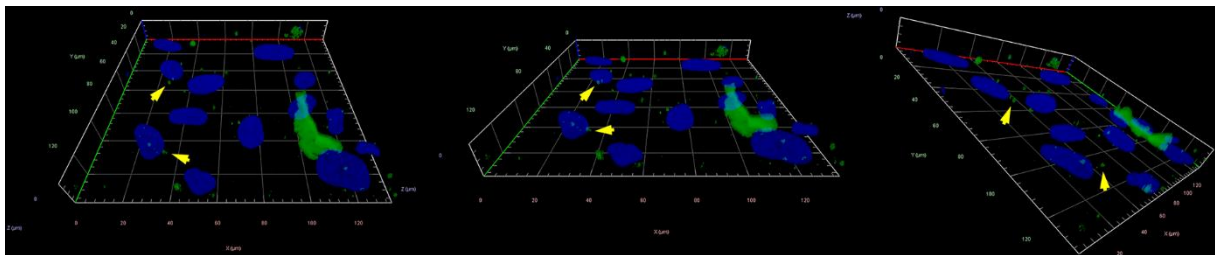

**Figure S42.** 3D CLSM images of SJS-A1 after incubated with **1Dp** ( $200\ \mu\text{M}$ ) for 3 min (Movie 4). The yellow arrows show the NBD fluorescence on the contact points of cells.

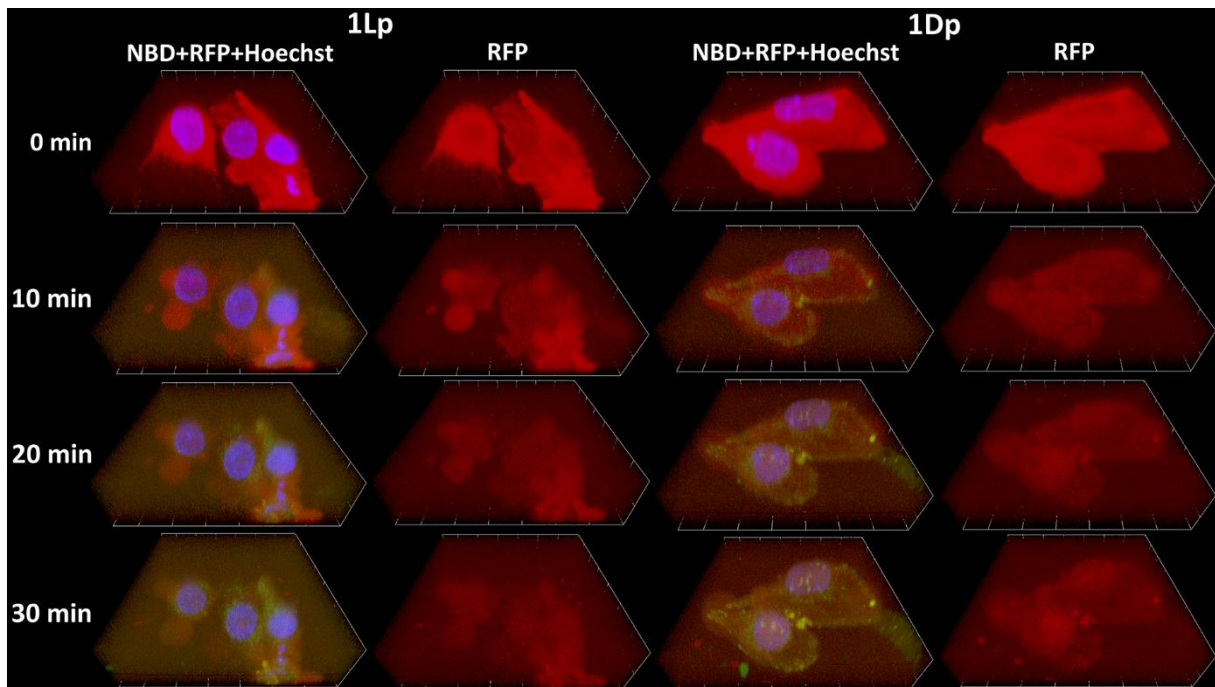

**Figure S43.** The Z-stack of CLSM images of tubulin-RFP transfected Saos2 cells after incubating with **1Lp** or **1Dp** for 0, 10, 20, and 30 min.

## SUPPORTING INFORMATION

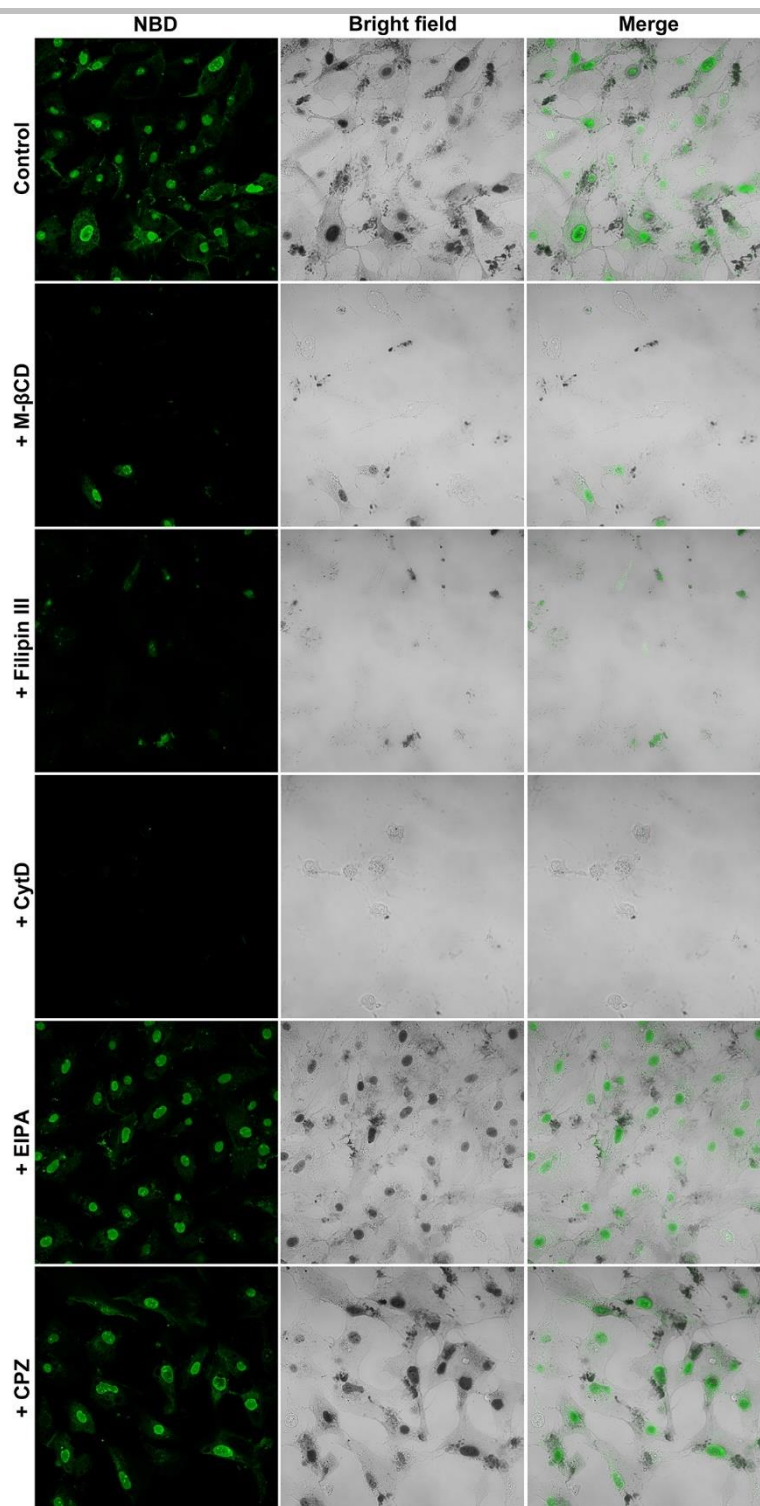

**Figure S44.** Confocal laser scanning microscopy (CLSM) images of SJSA-1 cells after being treated by **1Lp** (200  $\mu$ M) for 4 h in absence (Control) or presence of inhibitors M- $\beta$ CD (2 mM), Filipin III (2  $\mu$ g/mL), CytD (2.5  $\mu$ g/mL), EIPA (1  $\mu$ M), or CPZ (30  $\mu$ M).



## SUPPORTING INFORMATION

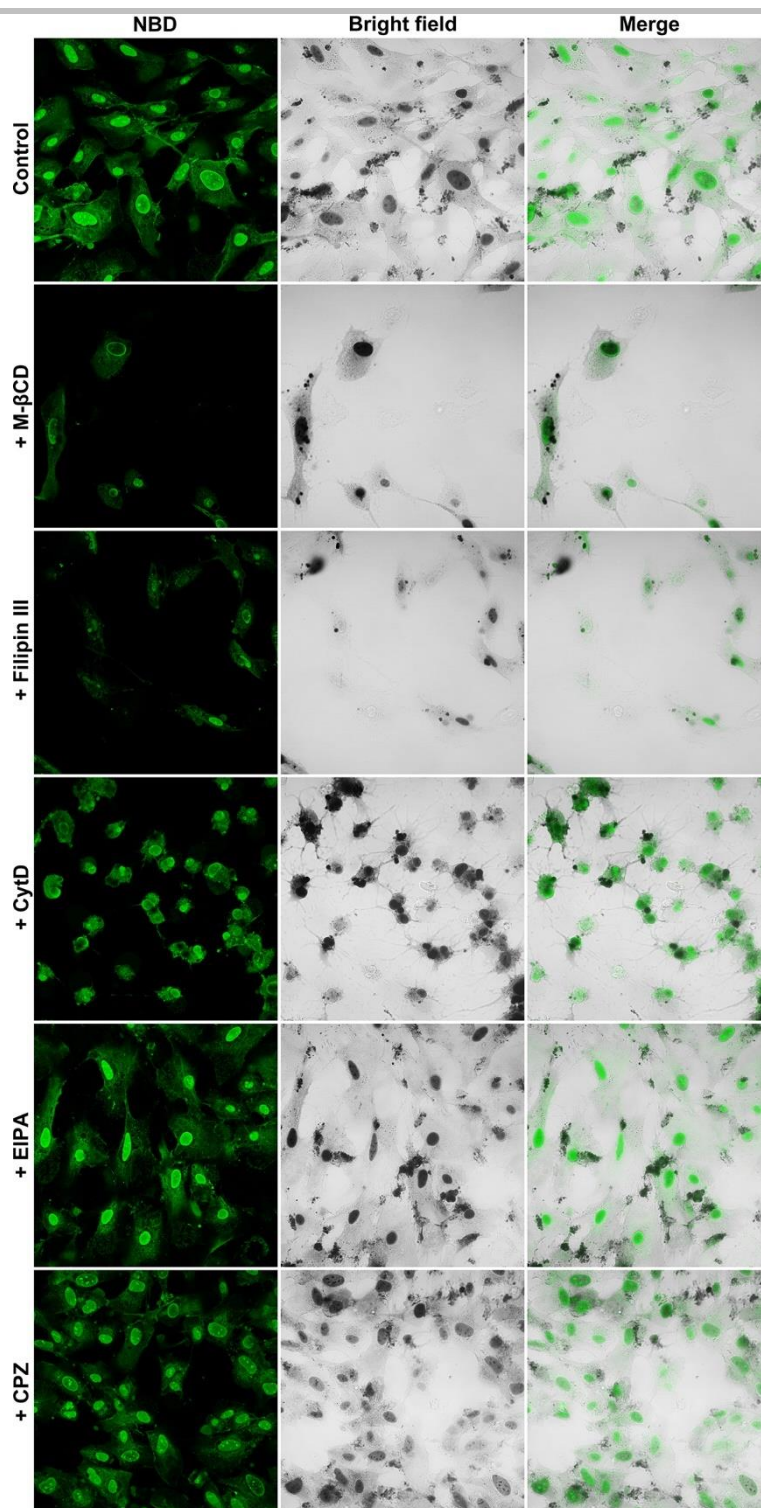

**Figure S45.** Confocal laser scanning microscopy (CLSM) images of SJSA-1 cells after being treated by **1Dp** (200  $\mu$ M) for 4 h in absence (Control) or presence of inhibitors M- $\beta$ CD (2 mM), Filipin III (2  $\mu$ g/mL), CytD (2.5  $\mu$ g/mL), EIPA (1  $\mu$ M), or CPZ (30  $\mu$ M).

## SUPPORTING INFORMATION

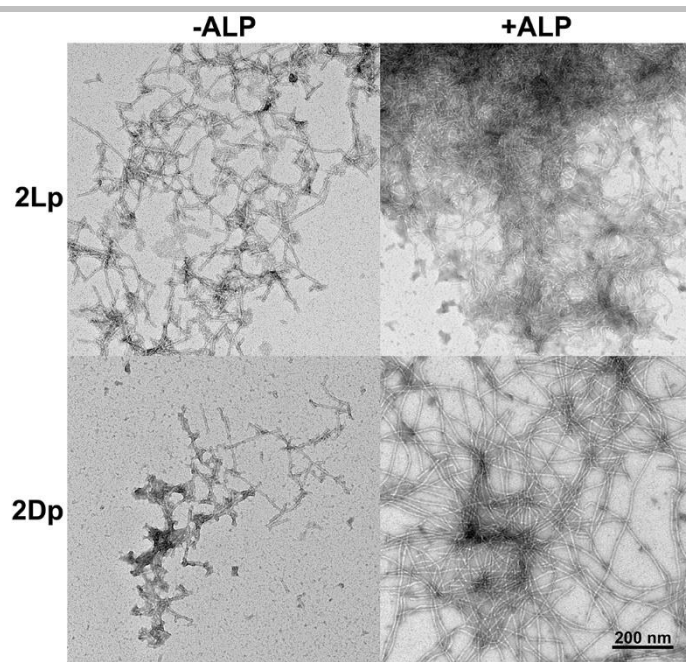

**Figure S46.** Transmission electron microscopes (TEM) images of **2Lp** and **2Dp** (400  $\mu$ M, PBS) before and after dephosphorylation by ALP (0.5 U/mL) for 24 h.

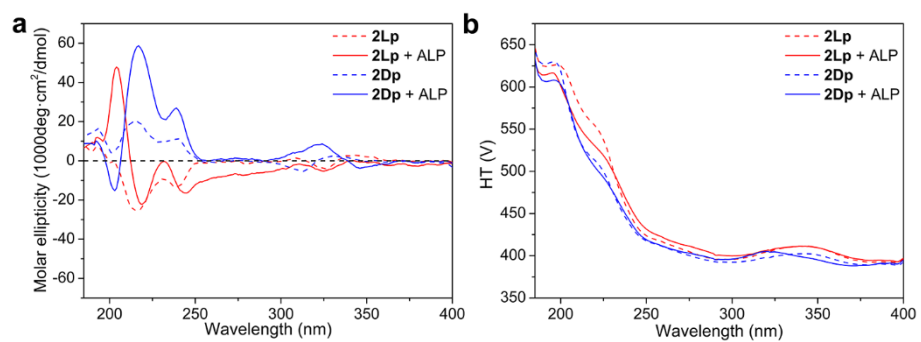

**Figure S47.** a) Circular dichroism (CD) spectra of **2Lp** and **2Dp** (400  $\mu$ M, PBS) before and after dephosphorylation by 0.5 U/mL of ALP for 24 h. b) HT voltages of a).

## SUPPORTING INFORMATION

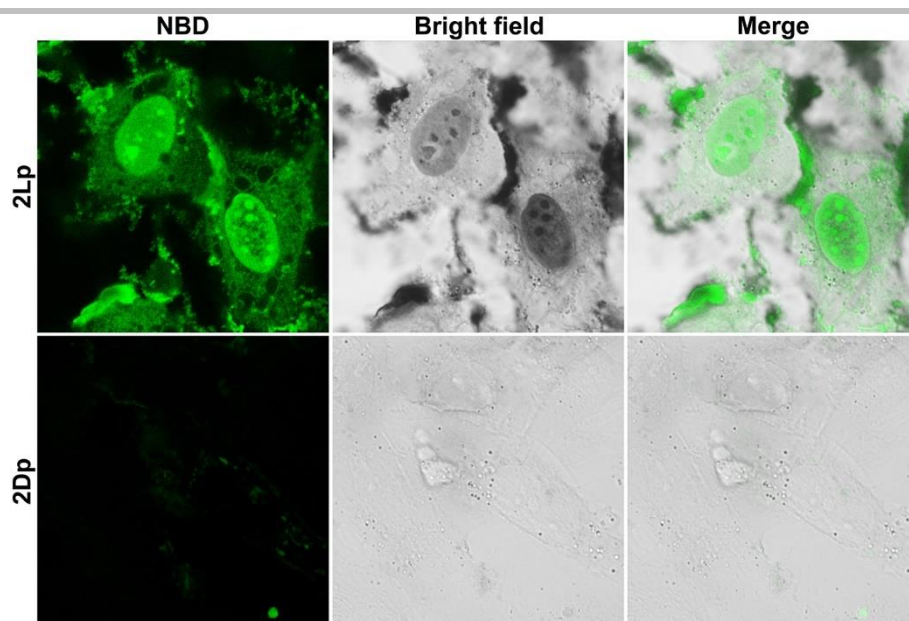

**Figure S48.** Confocal laser scanning microscopy (CLSM) images of SJSA-1 cells after being treated by **2Lp** or **2Dp** (400  $\mu$ M) for 2 h.

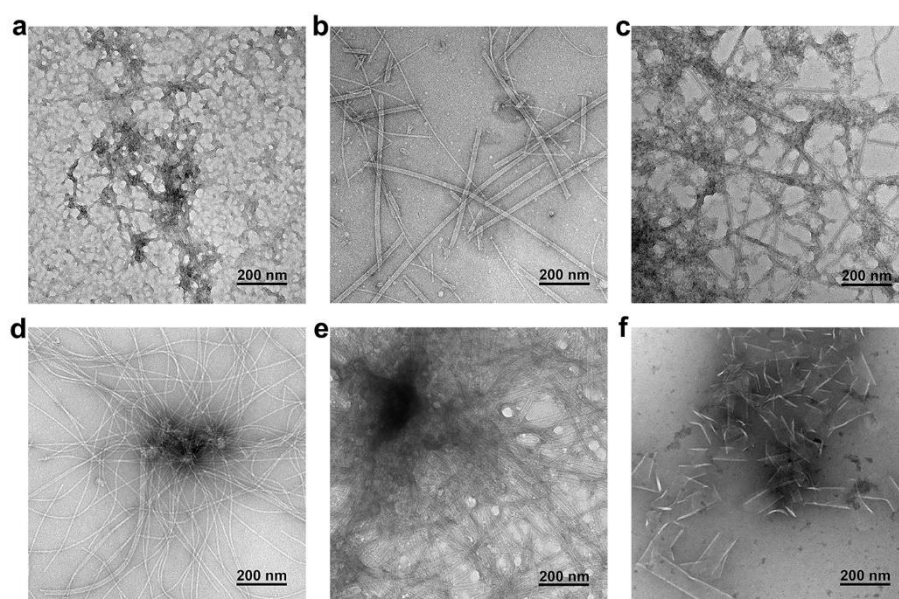

**Figure S49.** Transmission electron microscopes (TEM) images of a) H4C1 (1 mg/mL, PBS), b) **1Lp** (10 mM, PBS), c) **1Dp** (10 mM, PBS), d) **1Lp** (5 mM, PBS) + H4C1 (0.5 mg/mL, PBS), e) **1Dp** (5 mM, PBS) + H4C1 (0.5 mg/mL, PBS), f) **1Dp** (5 mM, PBS) + H4C1 (0.5 mg/mL, PBS) + ALP (1 U/mL, 24 h).

# SUPPORTING INFORMATION

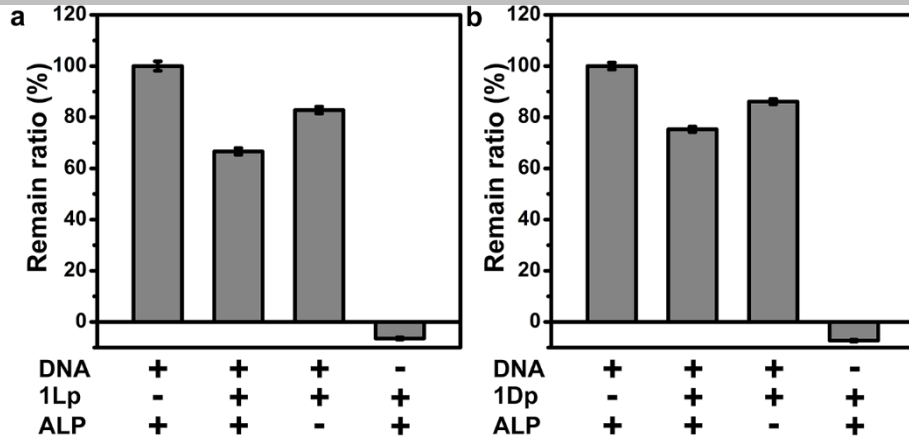

**Figure S50.** Remain ratio of DNA (the original concentration is 50  $\mu\text{g/mL}$ ) in solution after incubating with a) **1Lp** or b) **1Dp** (200  $\mu\text{M}$ ) and ALP (0.5 U/mL) for 24 h.

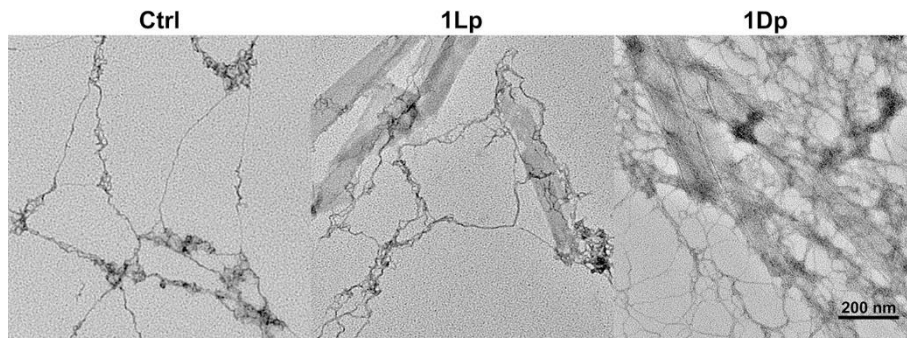

**Figure S51.** Transmission electron microscopes (TEM) images of DNA (50  $\mu\text{g/mL}$ ) after incubating with **1Lp** or **1Dp** (200  $\mu\text{M}$ ) and ALP (0.5 U/mL) for 24 h.

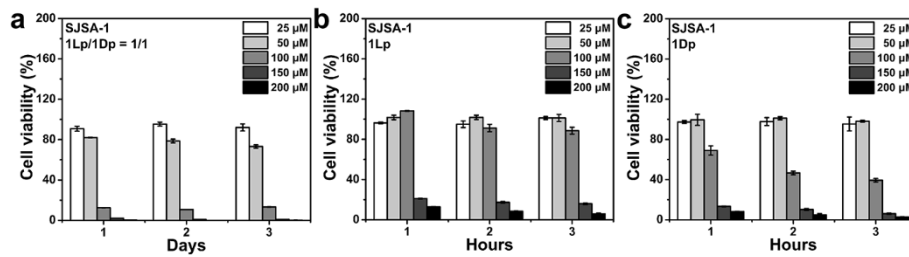

**Figure S52.** a) Cell viability of SJSA-1 cells after incubating with the mixture of **1Lp** and **1Dp** ( $[\text{1Lp}] = [\text{1Dp}]$ , the concentration is  $[\text{1Lp}] + [\text{1Dp}]$ ) for 24, 48 or 72 h. Cell viability of SJSA-1 cells after incubating with b) **1Lp** or c) **1Dp** for 1, 2, or 3 h.

# SUPPORTING INFORMATION

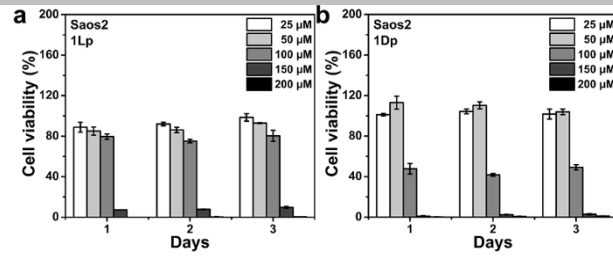

Figure S53. Cell viability of Saos2 cells after incubating with a) 1Lp or b) 1Dp for 24, 48, or 72 h.

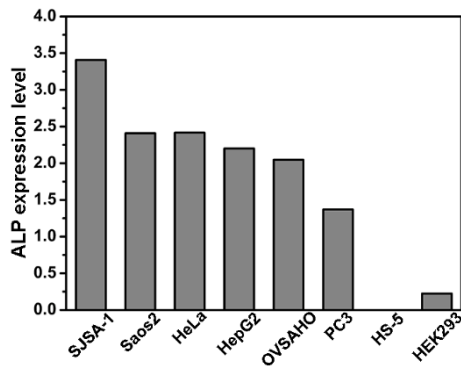

Figure S54. ALP expression levels of different cell lines<sup>[2]</sup>.

# SUPPORTING INFORMATION

## Supplementary Tables

**Table S1.** The gene name and the protein coverage in Sample PC

| Protein Coverage (%) | Gene Name        | Protein Coverage (%) | Gene Name | Protein Coverage (%) | Gene Name | Protein Coverage (%) | Gene Name |
|----------------------|------------------|----------------------|-----------|----------------------|-----------|----------------------|-----------|
| 62                   | H4C1             | 51                   | UBB       | 48                   | KRT1      | 48                   | KRT9      |
| 46                   | KRT2             | 44                   | RPS27A    | 43                   | ANXA2     | 40                   | GAPDH     |
| 39                   | KRT10            | 39                   | PFN1      | 39                   | UBC       | 38                   | ACAA2     |
| 38                   | H3C1             | 38                   | KRT16     | 37                   | HSD17B10  | 37                   | KRT14     |
| 37                   | PSMA6            | 34                   | CFL1      | 34                   | PKM       | 33                   | EEF1A1    |
| 33                   | EEF1A1P5         | 32                   | PDIA3     | 31                   | HSPD1     | 31                   | VDAC1     |
| 30                   | DECR1            | 30                   | HSPA5     | 29                   | ETFA      | 29                   | NACA      |
| 29                   | VDAC2            | 28                   | ECHS1     | 28                   | FN1       | 28                   | MDH2      |
| 28                   | PSMB5            | 28                   | RPL12     | 27                   | CKAP4     | 27                   | PHB       |
| 27                   | RPS3             | 26                   | ATP5F1B   | 26                   | RAN       | 25                   | ALDOA     |
| 25                   | CCT8             | 25                   | HSPA8     | 25                   | KRT5      | 24                   | ATP5F1A   |
| 24                   | CCT4             | 24                   | ENO1      | 24                   | RACK1     | 24                   | RPS2      |
| 23                   | SDCBP            | 22                   | ACTN1     | 22                   | CCT7      | 22                   | DSTN      |
| 22                   | PPIA             | 22                   | RPS4X     | 22                   | RPSA      | 22                   | TCP1      |
| 22                   | TMED7-<br>TICAM2 | 21                   | EIF4A1    | 21                   | PHB2      | 21                   | PPIB      |
| 21                   | RPL18            | 21                   | RPLP0     | 20                   | CCT3      | 20                   | FLNA      |
| 20                   | GNB1             | 20                   | ILF2      | 20                   | PSMB4     | 20                   | SFXN1     |
| 20                   | STOM             | 19                   | ACTN4     | 19                   | ECH1      | 19                   | H1-5      |
| 19                   | TMED7            | 19                   | UQCRC2    | 19                   | VCP       | 18                   | ATP1A1    |
| 18                   | CAP1             | 18                   | MYH9      | 18                   | RPN1      | 18                   | RPS3A     |
| 18                   | SLC25A3          | 18                   | VAT1      | 18                   | VIM       | 17                   | FH        |
| 17                   | GLUD1            | 17                   | HSP90AB1  | 17                   | HSPA9     | 17                   | LDHA      |
| 17                   | PDIA6            | 17                   | RPL13A    | 17                   | RPL7A     | 16                   | DLD       |
| 16                   | EEF2             | 16                   | NXF1      | 16                   | VCL       | 15                   | EIF2S3    |
| 15                   | GOT2             | 15                   | HADHA     | 15                   | LDHB      | 15                   | MYOF      |
| 15                   | RARS1            | 15                   | RCC2      | 15                   | RPN2      | 15                   | SMU1      |
| 14                   | ANXA1            | 14                   | AP2M1     | 14                   | FSCN1     | 14                   | GANAB     |
| 14                   | ITGB1            | 14                   | LTA4H     | 14                   | THBS1     | 13                   | CCT6A     |
| 13                   | COL12A1          | 13                   | HSP90B1   | 13                   | HSPG2     | 13                   | MYO1C     |
| 13                   | TFRC             | 13                   | TOMM40    | 12                   | ACTR2     | 12                   | ACTR3     |
| 12                   | EIF3L            | 12                   | HNRNPU    | 12                   | VDAC3     | 11                   | ACADVL    |
| 11                   | AGPS             | 11                   | ALB       | 11                   | AP2A1     | 11                   | ATP2A2    |
| 11                   | FASN             | 11                   | FLNB      | 11                   | HARS1     | 11                   | HSPA4     |
| 11                   | LRPPRC           | 11                   | PFKM      | 11                   | PFKP      | 10                   | APMAP     |
| 10                   | DDX17            | 10                   | PIP4K2C   | 10                   | TKT       | 9                    | AP2A2     |
| 9                    | HSD17B4          | 9                    | ITGAV     | 9                    | PDIA4     | 9                    | SHMT2     |
| 8                    | CCT2             | 8                    | PLOD1     | 8                    | PLOD3     | 8                    | SDHA      |
| 7                    | ACO2             | 7                    | AP2B1     | 7                    | CAT       | 7                    | CLTC      |
| 7                    | COL1A1           | 7                    | COL6A3    | 7                    | CPT2      | 7                    | EFTUD2    |
| 7                    | EPB41L2          | 7                    | ILF3      | 7                    | MCM3      | 7                    | MTHFD1    |
| 7                    | NNT              | 7                    | PRKDC     | 7                    | SEC23A    | 6                    | ACLY      |
| 6                    | AHSG             | 6                    | ATP2B4    | 6                    | CD248     | 6                    | COL1A2    |
| 6                    | COPB2            | 6                    | DYNC1H1   | 6                    | HGFAC     | 6                    | NIBAN2    |
| 6                    | NRP1             | 6                    | PLOD2     | 6                    | SNRNP200  | 6                    | TLN1      |
| 6                    | UGGT1            | 5                    | IGF2R     | 5                    | PXDN      | 5                    | SLC3A2    |
| 4                    | FBN1             | 4                    | ITGA3     | 4                    | ITIH2     | 4                    | PLEC      |
| 3                    | C3               | 3                    | FAT1      | 3                    | PLG       |                      |           |

## SUPPORTING INFORMATION

**Table S2.** The gene name and the protein coverage in Sample **PL**

| Protein Coverage (%) | Gene Name |
|----------------------|-----------|----------------------|-----------|----------------------|-----------|----------------------|-----------|
| 46                   | VIM       | 40                   | CFL1      | 38                   | ENO1      | 25                   | HSPA8     |
| 25                   | TUBB      | 23                   | GAPDH     | 21                   | KRT2      | 20                   | ANXA2     |
| 18                   | KRT1      | 15                   | KRT10     | 14                   | ANXA1     | 14                   | KRT5      |
| 13                   | MARCKS    | 13                   | PDIA3     | 13                   | PGK1      | 12                   | KRT9      |
| 10                   | FKBP4     | 9                    | ANXA2P2   | 9                    | PDIA4     | 7                    | MSN       |
| 3                    | FLNA      | 2                    | FLNB      |                      |           |                      |           |

## SUPPORTING INFORMATION

### Supplementary Movies: Description of the Supplementary Movies

- Movie 1:** 2D time-lapse CLSM of SJSA-1 cells being incubated with **1Lp** (200uM)  
**Movie 2:** 2D time-lapse CLSM of SJSA-1 cells being incubated with **1Dp** (200uM)  
**Movie 3:** 3D time-lapse CLSM of SJSA-1 cells being incubated with **1Lp** (200uM)  
**Movie 4:** 3D time-lapse CLSM of SJSA-1 cells being incubated with **1Dp** (200uM)  
**Movie 5:** 2D time-lapse CLSM of Saos2 cells being incubated with **1Lp** (200uM)  
**Movie 6:** 2D time-lapse CLSM of Saos2 cells being incubated with **1Dp** (200uM)  
**Movie 7:** 2D time-lapse CLSM of RFP expressing SJSA-1 cells being incubated with **1Lp** (200uM)  
**Movie 8:** 2D time-lapse CLSM of RFP expressing SJSA-1 cells being incubated with **1Dp** (200uM)  
**Movie 9:** 2D time-lapse CLSM of TNAP-RFP transfected HEK293 cells being incubated with **1Lp** (200uM)  
**Movie 10:** 2D time-lapse CLSM of TNAP-RFP transfected HEK293 cells being incubated with **1Dp** (200uM)  
**Movie 11:** 3D time-lapse CLSM of actin-RFP transfected SJSA-1 cells being incubated with **1Lp** (200uM)  
**Movie 12:** 3D time-lapse CLSM of actin-RFP transfected SJSA-1 cells being incubated with **1Dp** (200uM)  
**Movie 13:** 3D time-lapse CLSM of actin-RFP transfected Saos2 cells being incubated with **1Lp** (200uM)  
**Movie 14:** 3D time-lapse CLSM of actin-RFP transfected Saos2 cells being incubated with **1Dp** (200uM)  
**Movie 15:** 3D time-lapse CLSM side views of SJSA-1 cells and Saos2 cells as controls

### References

- [1] G. Backliwal, M. Hildinger, V. Hasija, F. M. Wurm, *Biotechnol. Bioeng.* **2008**, *99*, 721-727.  
[2] a) A. D. Rouillard, G. W. Gundersen, N. F. Fernandez, Z. Wang, C. D. Monteiro, M. G. McDermott, A. Ma'ayan, *Database* **2016**. b) W. Tan, Q. Zhang, J. Wang, M. Yi, H. He, B. Xu, *Angew. Chem. Int. Ed.* **2021**, *60*, 12796-12801.

### Author Contributions

S. L. and B. X. conceived and designed the experiments and wrote the manuscript. S. L. performed most of the experiments, analyzed data, prepared figures. Q. Z. helped the synthesis. H. H. helped with the transfection of HEK293 cells. M. Y. helped with up-taking and fractionation study. W. T. helped with the 3D CLSM imaging. J. G. helped with TEM imaging.
